1 **The *Arabidopsis* NOT4A E3 ligase coordinates PGR3 expression to regulate**  
2 **chloroplast protein translation**

3

4

5 **Authors**

6 Mark Bailey<sup>1</sup>, Aiste Ivanauskaite<sup>2</sup>, Julia Grimmer<sup>3</sup>, Oluwatumise Akintewe<sup>1</sup>, Adrienne C.  
7 Payne<sup>1</sup>, Ross Etherington<sup>1</sup>, Anne-Marie Labandera<sup>1</sup>, Rory Osborne<sup>1</sup>, Marjaana Rantala<sup>2</sup>,  
8 Sacha Baginsky<sup>3,4</sup>, Paula Mulo<sup>2</sup> and Daniel J. Gibbs<sup>1\*</sup>

9

10 <sup>1</sup> School of Biosciences, University of Birmingham, Edgbaston, UK, B15 2TT

11 <sup>2</sup> Molecular Plant Biology, University of Turku, 20520 Turku, Finland

12 <sup>3</sup> Institute of Biochemistry and Biotechnology, Martin-Luther-University Halle-Wittenberg,  
13 Kurt-Mothes-Str. 3a, 06120 Halle (Saale), Germany

14 <sup>4</sup> Current address: Biochemistry of Plants, Faculty for Biology and Biotechnology,  
15 Ruhr-University Bochum, Universitätsstrasse 150, 44801 Bochum, Germany

16

17

18

19

20 \*Corresponding author: [d.gibbs@bham.ac.uk](mailto:d.gibbs@bham.ac.uk)

21

22

23

24

25

26

27

28

29

30

31 **Abstract**

32 Chloroplast function requires the coordinated action of nuclear- and chloroplast-derived  
33 proteins, including several hundred nuclear-encoded pentatricopeptide repeat (PPR)  
34 proteins that regulate plastid mRNA metabolism. Despite their large number and importance,  
35 regulatory mechanisms controlling PPR expression are poorly understood. Here we show  
36 that the Arabidopsis NOT4A ubiquitin-ligase positively regulates PROTON GRADIENT 3  
37 (PGR3), a PPR protein required for translating 30S ribosome subunits and several thylakoid-  
38 localised photosynthetic components within chloroplasts. Loss of NOT4A function leads to a  
39 strong depletion of plastid ribosomes, which reduces mRNA translation and negatively  
40 impacts photosynthetic capacity, causing pale-yellow and slow-growth phenotypes.  
41 Quantitative transcriptome and proteome analyses reveal that these defects are due to a  
42 lack of PGR3 expression in *not4a*, and we show that normal plastid function is restored  
43 through transgenic PGR3 expression. Our work identifies NOT4A as crucial for ensuring  
44 robust photosynthetic function during development and stress-response, through modulating  
45 PGR3 levels to coordinate chloroplast protein synthesis.

46

47

48

49

50

51

52

53

54

55

56

57

58

59

60

61

62

63

64

65

66

## 67 **Introduction**

68 The synthesis of energy from the sun, photosynthesis, supports organic life on earth. Light  
69 harvesting in green plants takes place within the specialized chloroplast organelle, believed  
70 to have arisen from engulfment of a photosynthetic prokaryote by an ancestral eukaryotic  
71 cell (Archibald, 2015). Coevolution and merging of these organisms has resulted in nuclear  
72 and chloroplast genomes separated within cellular compartments. In land plants, the  
73 chloroplast genome comprises of ~130 genes, yet chloroplasts contain around 3000 different  
74 proteins (Zoschke and Bock, 2018). Consequently, chloroplast function requires expression  
75 not only of chloroplast encoded proteins, but a multitude of nuclear encoded genes, which  
76 are imported into chloroplasts post-translationally. One such group of nuclear derived factors  
77 is the pentatricopeptide repeat domain (PPR) containing proteins. The PPR protein family  
78 has significantly expanded in plants (~450 in Arabidopsis, vs <10 in humans and yeast;  
79 (Schmitz-Linneweber and Small, 2008)), and members are characterized by a 35-amino acid  
80 repeat sequence that facilitates RNA binding and enables them to provide critical gene  
81 expression control within chloroplasts and mitochondria (Barkan and Small, 2014). Through  
82 binding to organellar RNAs, PPR proteins stabilize gene transcripts, facilitate post-  
83 transcriptional processing and promote translation of the encoded proteins (Barkan and  
84 Small, 2014; Manna, 2015). Whilst their function in the regulation of gene expression control  
85 within organelles has been described, including many of the RNA species to which they  
86 bind, little is known about how their expression is regulated prior to import.

87 Precise, selective removal of proteins is essential to cellular development and response. In  
88 eukaryotes, proteins can be marked for degradation by the megacomplex protease known  
89 as the 26S proteasome, following enzymatic attachment of a chain of ubiquitin molecules  
90 (Sadanandom et al., 2012). Ubiquitin attachment requires sequential enzyme activities: initial  
91 processing of pre-ubiquitin by deubiquitinating enzymes (DUBs), followed by bonding to an  
92 E1 activating enzyme, transfer to an E2 conjugating enzyme, and finally, conjugation to a  
93 substrate mediated by an E3 ligase enzyme (Callis, 2014). Despite the absence of the  
94 ubiquitin proteasome system (UPS) within plastids, three ubiquitin E3 ligases mediating  
95 chloroplast proteostasis have been described. The Hsc70-interacting protein (CHIP) E3  
96 ligase was shown to target pre-plastid proteins for degradation in a chloroplast import-  
97 defective mutant background, indicating that it is required for ensuring correct and complete  
98 targeting of proteins to this organelle (Lee et al., 2009; Shen et al., 2007a; 2007b). A second  
99 E3 ligase, Plant U-box ubiquitin ligase PUB4, regulates the degradation of oxidatively  
100 damaged chloroplasts (Chlorophagy), via ubiquitination of envelope proteins (Woodson et  
101 al., 2015). Finally, a system for chloroplast associated protein degradation (CHLORAD)

102 targets damaged components of the chloroplast transmembrane protein import machinery  
103 (TOC) (Ling et al., 2019). CHLORAD-targeted TOC subunits are ubiquitinated by the integral  
104 chloroplast outer membrane ubiquitin ligase SP1, promoting removal and delivery to the 26S  
105 proteasome via the mp85-type beta-barrel channel SP2 and AAA+ chaperone CDC48 (Ling  
106 and Jarvis, 2015; Ling et al., 2019; 2012). However, despite the evolutionary expansion and  
107 significance of the UPS in plants (accounting for more than 5% of the genome in *Arabidopsis*  
108 (Smalle and Vierstra, 2004)) the full extent to which the UPS can influence chloroplast  
109 function remains to be determined.

110

111 The E3 ubiquitin-ligase NOT4 contains a unique combination of RING finger and RNA  
112 Recognition Motif (RRM) domains, which places its function at the interface of proteolysis  
113 and RNA biology (Cano et al., 2010; Chen et al., 2018; Wu et al., 2018). Studies of NOT4 in  
114 yeast and animals have revealed that it associates with ribosomes, and plays a role in co-  
115 translational quality control of mRNA and protein, to ensure efficient and correct translation  
116 of polypeptides (Dimitrova et al., 2009; Duttler et al., 2013; Halter et al., 2014; Preissler et  
117 al., 2015; Wu et al., 2018). Furthermore, NOT4 plays a role in the assembly and integrity of  
118 functional proteasomes in yeast (Panasencko and Collart, 2011). Although it can exist as a  
119 monomer, NOT4 contributes to global RNA metabolism and gene expression control as a  
120 member of the CCR4-NOT complex (Albert et al., 2002; Collart and Panasencko, 2012).  
121 Whilst the NOT4 CCR4-NOT association is strong in yeast, structural and biochemical  
122 studies indicate it is more labile in animals, suggesting that, whilst general functions in  
123 translational regulation are conserved, there has been kingdom specific divergence in  
124 mechanism (Bhaskar et al., 2015; Keskeny et al., 2019). NOT4 has also been proposed to  
125 function as an N-recognin E3 ligase of the acetylation-dependent N-end rule pathway in  
126 yeast (Shemorry et al., 2013). Despite a central role for yeast and mammalian NOT4 in co-  
127 translational control and moderating the stabilities of mRNA and proteins, the presence and  
128 functions of NOT4-like E3 ligases in plants has not been investigated in detail previously.

129

130 Here we identify three NOT4-like E3 ligases in *Arabidopsis thaliana*, and show that one of  
131 these – NOT4A - has diverged toward a key role in regulating chloroplast protein biogenesis  
132 and photosynthetic function. Using genetic, biochemical, transcriptomic and proteomic  
133 approaches, we show that NOT4A is required for expression of the PPR protein PGR3, a  
134 nuclear encoded factor that is imported into plastids to promote ribosome formation and  
135 ensure efficient chloroplast-encoded protein synthesis. *not4a* mutants, which have severely  
136 depleted *PGR3* levels, share the molecular consequences of null *pgr3* mutants, having  
137 reduced abundance of plastid RNAs that are normally targeted by PGR3, and a depletion of

138 chloroplast ribosomes. This results in concomitant defects in chloroplast protein translation,  
139 and reduced levels of many photosynthetic complexes (including Cyt  $b_6f$ ), which leads to a  
140 pale-yellow phenotype, high-light stress sensitivity and compromised photosynthetic  
141 capacity. Site directed mutational analysis of NOT4A reveals its E3 ligase and RNA binding  
142 functions are both essential to its chloroplast related function, and transgenic expression of  
143 PGR3 in *not4a* is sufficient to restore wild type-like growth and development. Our work  
144 identifies NOT4A as an important mediator of PPR controlled plastid protein biogenesis,  
145 through promotion of PGR3 expression, uncovering a new layer of homeostatic and stress-  
146 responsive regulation controlling chloroplast form and function.

147

148

## 149 **Results**

### 150 **Identification of NOT4-like protein in Arabidopsis**

151 To identify NOT4-like proteins in plants we searched for protein sequences with homology to  
152 ScNOT4 from *Saccharomyces cerevisiae*. In contrast to the single NOT4 gene present in  
153 humans, Drosophila and yeast, we identified three putative homologues in the model plant  
154 *Arabidopsis thaliana*, which we confirmed with reciprocal BLASTs. The three homologues,  
155 which we named NOT4A, -B and -C, possess 38-39% identity with ScNOT4 (Figures 1A and  
156 S1), and crucially share high identity across the unique combination of RING, RRM and  
157 C3H1 domains. We isolated homozygous T-DNA insertion lines for NOT4A-C from publicly  
158 available collections (GABI-KAT, SALK, SAIL) and confirmed T-DNA inserts and full-length  
159 mRNA knockout (Figures S2A and B). The *not4a* line displayed a pale-yellow phenotype and  
160 a clear delay in development, flowering significantly later than wild type under normal growth  
161 conditions (Figures 1B and D). Moreover, *not4a* had a significant reduction of chlorophyll  
162 (Figure 1E), and Lugol's staining revealed reduced starch accumulation relative to Col-0  
163 (Figure 1F). In contrast, *not4b* and *not4c* displayed no obvious growth phenotypes, and so  
164 we decided to focus our attention on NOT4A.

165

166 To confirm the pale-yellow *not4a* phenotype was due to loss of NOT4A expression we  
167 complemented the mutant by reintroduction of full-length genomic NOT4A with a c-terminal  
168 GUS tag, driven by ~2kb of its endogenous promoter. Two independent transgenic lines  
169 expressing the full length NOT4A protein (N4A-G1 and N4A-G3, Figure S2C), displayed  
170 wild-type greenness and normal development (Figures 1C, D and E), and NOT4A  
171 expression, determined by GUS staining, was localized to the first true leaves of seedlings  
172 where the pale mutant phenotype first presents (Figure 1G). Analysis of the full length

173 NOT4A amino acid sequence using TargetP (Emanuelsson et al., 2007) revealed no  
174 obvious chloroplast transit peptide (cTP). In accordance with this prediction, anti-GUS  
175 western blotting of total vs chloroplast-specific protein extracts indeed revealed that NOT4A  
176 is not associated with this organelle, which is also in line with the absence of the ubiquitin  
177 proteasome system in plastids (Figure 1H).

178

### 179 **NOT4A is required for chloroplast and photosynthetic function**

180 The growth, development, and starch depletion phenotypes of *not4a* point to general defects  
181 in photosynthesis. To investigate this further, we carried out an RNA seq analysis on 10-day-  
182 old *not4a* and Col-0 seedlings. This revealed a large number of differentially expressed  
183 genes (DEGs) in the mutant relative to WT (>2300 genes,  $P < 0.05$ ), with GO-analysis  
184 showing that a large proportion of these are chloroplast related, and implicated across all  
185 structures of this organelle (Figures 2A, B and S3, Data file 1). Carbon assimilation in stroma  
186 is undertaken by an array of higher order enzymatic complexes present within the internal  
187 membrane system of chloroplasts (thylakoids), which includes many nuclear-encoded  
188 components that were mis-regulated in the *not4a* transcriptome (Figure S3, Data file 1)(Allen  
189 et al., 2011). We therefore analysed the composition of the protein complexes within the  
190 thylakoids of Col-0, *not4a* and N4A-G3 complementation lines by blue native gel analysis  
191 (BN-PAGE) (Aro et al., 2005; Järvi et al., 2011; Rantala et al., 2017). This revealed in *not4a*  
192 a severe decrease in the accumulation of protein bands corresponding to the photosystem II  
193 monomer and Cytochrome  $b_6/f$  complex (PSII m/ Cyt  $b_6/f$ ), as well as the photosystem I -  
194 NAD(P)H dehydrogenase megacomplex (PSI-NDH), when equal protein was loaded (Figure  
195 2C and S4A). Individual subunits were then resolved by a second denaturing dimension,  
196 which confirmed lower abundance of the PetA, -B, -C and -D Cytochrome  $b_6/f$  complex  
197 subunits (Figure 2D), as well as the CP47, CP43, D2 and D1 subunits of the PSII monomer  
198 (Figure S4B). In addition, dual PAM measurements revealed a clear reduction in electron  
199 transfer rate (ETR) in *not4a*, consistent with depletion of Cyt $b_6/f$  within the thylakoid  
200 membranes (Figure 2E) (Tikhonov, 2014).

201

202 To complement our RNA seq analysis and investigate differences in protein abundance in  
203 *not4a* vs WT in more detail, we carried out a quantitative proteomics analysis of total protein  
204 extracts as previously described (Helm et al., 2014). Overall, a substantial number of  
205 proteins were significantly changed in abundance in the mutant compared to wildtype  
206 (Figure 3A, Data file 2). Analysis of the chloroplast-specific proteins in these datasets (619 in  
207 WT, 689 in *not4a*; Figure 3B) confirmed reduced levels of the majority of the subunits

208 making up the Cytb<sub>6</sub>f and NDH complexes, but remarkably also identified a broad depletion  
209 of many of the central enzymes required for photosynthesis (Figures 3C and S4C, Data file  
210 2), which was likely masked in the blue native gels due to thylakoid enrichment and equal  
211 protein loading.

212

### 213 **NOT4A is required for plastid ribosome biogenesis**

214 In addition to a reduction of photosynthetic proteins, we also observed a significant  
215 downregulation or absence of plastid ribosome proteins in *not4a* (Figure 3B, D and F, Data  
216 file 2). Remarkably, this effect was specific to proteins making up the 30S subunit of the  
217 chloroplast ribosome, whilst components of the 50S subunit were detected at similar or  
218 slightly increased levels relative to wild-type (Figure 3D and F). Of 20 30S subunits identified  
219 in the proteomic analysis, 18 were significantly down regulated (>1.5 fold) in *not4a* vs WT,  
220 whilst none of the 26 50S subunits identified were reduced in abundance. In support of this,  
221 we also observed a significant reduction of chloroplast 30S-associated 16S rRNA in *not4a*  
222 relative to WT, whilst levels of the 50S-associated 23S and 23Sb rRNAs were similar  
223 (Figures 3E and S5). Interestingly, the reduction of 30S subunits was only apparent at the  
224 protein level, as transcripts of the nuclear encoded subunits were in fact elevated in the RNA  
225 seq data (Figure 3F, Data file 2). This indicates that decreased 30S ribosome abundance in  
226 *not4a* is linked to a translational or post-translational, rather than transcriptional, defect.

227

### 228 **Plastid mRNA translation is compromised in the *not4a* mutant**

229 The severe reduction of 30S ribosome subunits and many chloroplast encoded proteins in  
230 *not4a* (Figures 3D, F and S4C) prompted us to investigate chloroplast translation in this  
231 mutant. We observed extreme hypersensitivity of *not4a* to the chloroplast ribosome-specific  
232 inhibitor lincomycin (Figure 4A and B). Lincomycin treated Col-0 seedlings were smaller in  
233 size and more yellow than control plants, resembling untreated *not4a* mutants, corroborating  
234 the observation that chloroplast ribosome activity is perturbed in *not4a* (Figure 4A and B). In  
235 contrast, no obvious differences in the sensitivity to the cytosolic ribosome inhibitor  
236 cycloheximide (CHX) were observed (Figure S6A). Next we assessed chloroplast-specific  
237 protein synthesis in WT and *not4a* through assaying incorporation rates of the aminoacyl-  
238 tRNA analogue puromycin in isolated chloroplasts (Van Hoewyk, 2016). Puromycin labelling  
239 of nascent proteins was strongly reduced in *not4a* chloroplasts relative to WT, indicating  
240 reduced translation capacity in the mutant (Figure 4C). Alongside the lincomycin results, this  
241 reveals that the reduced levels of 30S ribosomes in *not4a* causes defects in chloroplast  
242 mRNA translation. Since a majority of photosynthetic complexes include chloroplast-

243 encoded components (Allen et al., 2011), reduced chloroplast translation likely explains the  
244 broad reduction in photosynthetic proteins in *not4a*, with subunit imbalance leading to  
245 complex collapse i.e. degradation of unassembled nuclear subunits also (Choquet and  
246 Wollman, 2002; Peng et al., 2009, Juskiewicz and Hegde, 2018).

247

248 Reduction in *not4a* of the PSII monomer (Figures 2C, S4B and C), a repair intermediate of  
249 the bioactive PSII-LHCII super complex, suggests defects in PSII repair. The central scaffold  
250 of PSII is the chloroplast encoded D1 protein, a photolabile protein that is enzymatically  
251 broken down after light-induced damage (Li et al., 2018). The high turnover rate of the D1  
252 protein requires rapid synthesis and replacement to reassemble the PSII complex, which is  
253 essential for photosynthesis. We examined D1 turnover and PSII efficiency during and after  
254 high light (HL) exposure of the *not4a* and Col-0 plants. After 1.5hrs of HL D1 abundance was  
255 reduced to ~25% of starting levels in *not4a*, whereas levels in Col-0 were maintained above  
256 90% (Figure 4D). This is in line with the detected PSII activities, measured as  $F_v/F_m$ , which  
257 decreased in both lines, but less severely in Col-0. After 16 hours of recovery in standard  
258 conditions (GL), Col-0 D1 levels returned to 100%, whilst in *not4a* they remained below 50%  
259 (Figure 4D), implying defects in D1 biosynthesis. Reduction of D1 when lincomycin was  
260 applied during HL treatment to inhibit translation, confirmed that D1 synthesis compensates  
261 for damaged and degraded protein in Col-0. Taken together these data show that NOT4A is  
262 required to maintain homeostatic and stress-responsive translational productivity in  
263 chloroplasts.

264

#### 265 **Functional domain analysis of NOT4A**

266 To investigate the mechanistic connection between NOT4A and chloroplast function in more  
267 detail, we mutated the conserved RING and RRM domains in *pNOT4A::NOT4A-GUS* and  
268 tested if these variants could still complement the *not4a* mutant. These mutations were  
269 based on conserved homologies to yeast ScNOT4 where the activities of both domains were  
270 successfully knocked out previously (Figure 5A and S1)(Chen et al., 2018; Dimitrova et al.,  
271 2009; Mulder et al., 2007). NOT4A proteins containing either a single L11A mutation in the  
272 N-terminal RING domain, three point mutations in the RRM domain (G137A, Y166A and  
273 C208A), or all four substitutions were expressed under the endogenous promoter (Figure  
274 5B). We observed particularly high levels of the L11A RING mutant variant, suggesting that  
275 abolishing RING activity may enhance NOT4A stability by preventing auto-ubiquitination, a  
276 common feature in E3 ubiquitin-ligase regulation (de Bie and Ciechanover, 2011). Mutation  
277 of the RRM however, resulted in reduced NOT4A levels, presumably due to disruption of



278 protein activity leading to enhanced auto-ubiquitination, a notion supported by comparatively  
279 increased abundance of NOT4A with combined RING/RRM mutations. In contrast to  
280 complementation with WT *pNOT4A::NOT4A-GUS*, none of the mutant variants were  
281 functional *in planta*, as evidenced by the incapacity to restore WT tolerance to lincomycin or  
282 revert the pale-yellow phenotype of the *not4a* mutant (Figure 5C and D). Significantly,  
283 NOT4A expression was upregulated when seedlings were grown in the presence of  
284 lincomycin, suggesting NOT4A expression is controlled by plastid to nucleus retrograde  
285 signalling during chloroplast translational stress (Figure 5E). Overall, we can deduce that  
286 both domains of NOT4A are required for its homeostatic and stress-responsive roles in  
287 regulating chloroplast function.

288

### 289 **The *not4a* mutant mimics the *pgr3* pentatricopeptide mutant**

290 To identify potential causal agents of 30S ribosomal depletion in *not4a* we analysed the  
291 DEGs annotated with chloroplast functions (GO:0009507) in the *not4a* RNAseq dataset  
292 (Figure 6A, Data file 1). A total of 828 DEGs were identified, with a vast majority of these  
293 (699) being upregulated relative to WT. Amongst these genes were 34 chloroplast-targeted  
294 PPR proteins that regulate organellar gene expression, which may be upregulated to  
295 compensate for compromised translation in the mutant (Figure S6B, Data file 2) (Bryant et  
296 al., 2011; Myouga et al., 2010; 2013). Remarkably, we found that one of these chloroplast-  
297 targeted PPR proteins, Proton Gradient Regulated 3 (PGR3), was downregulated to  
298 undetectable levels in the mutant, but restored to WT levels in the N4A-G3 complementation  
299 line (Figure 6B). PGR3 was originally identified in a screen for mutants with defects in non-  
300 photochemical quenching (NPQ) determined by chlorophyll fluorescence (Yamazaki et al.,  
301 2004). The compromised NPQ and ETR of *pgr3* mutants was subsequently attributed to  
302 PGR3's role in promoting stabilisation and translation of the chloroplast *PetL* operon (which  
303 encodes for the Cyt  $b_6f$  subunits *PetL* and *PetG*), as well as a role in regulating production of  
304 the NDH subunit *NdhA*. As such, *pgr3* mutants have reduced levels of Cyt  $b_6f$  and NDH,  
305 similar to *not4a* (Figures 2C, D and S4A, B and C) (Cai et al., 2011; Fujii et al., 2013; Rojas  
306 et al., 2018; Yamazaki et al., 2004). Moreover, *pgr3* mutants in maize were shown to have  
307 reduced levels of chloroplast ribosomes, which resembles our observations in *not4a*  
308 (Belcher et al., 2015). These similarities therefore suggested that the defects in *not4a* might  
309 be due to highly reduced levels of PGR3 in this mutant.

310

311 To test this further, we acquired a recently isolated null mutant of *PGR3* in the Arabidopsis  
312 Wassilewskija-4 (Ws-4) ecotype, *pgr3-4* (Rojas et al., 2018). *Pgr3-4* shares a similar delayed

313 development and pale-yellow phenotype to *not4a* (Figure 6C). Reduced transcripts of *PetL*  
314 and *PetG* were detected in both *not4a* and *pgr3-4* relative to their respective wildtypes,  
315 consistent with the requirement for PGR3 in stabilising these mRNAs (Figures 6E and S6C).  
316 Consequently, this results in a similar reduction in ETR in both *not4a* and *pgr3-4* (Figure  
317 6G). To determine if PGR3 is required for chloroplast translation, we tested sensitivity of the  
318 mutant to lincomycin. Here, *pgr3-4* displayed a similar degree of hypersensitivity as *not4a*  
319 (Figure 6D). Furthermore, we observed a significant reduction in 16s rRNAs in *pgr3-4*, which  
320 points to a comparable depletion of 30S subunits in both mutants (Figure 6F).

321

322 In Arabidopsis PGR3 was recently shown to control stability and stimulate expression of the  
323 30S *Rps8* and 50S *Rpl14* ribosomal subunits (Rojas et al., 2018). Interestingly a second  
324 PPR protein, SVR7, also regulates *Rpl14* stability, but does not affect *Rps8* translation  
325 (Rojas et al 2018; Zoschke et al., 2013). We observed enhanced levels of SVR7 protein in  
326 *not4a* relative to WT (Figure S6B), perhaps compensating for loss of *PGR3*, and explaining  
327 why 50S subunits are not affected. In contrast, defects in *Rps8* translation due to loss of  
328 PGR3 in *not4a* likely explains why ribosome depletion is specific to the 30S subunit, since  
329 protein complex stoichiometries are highly regulated, with the inability to assemble complete  
330 complexes often leading to degradation of orphan subunits (Juszkiewicz and Hegde, 2018;  
331 Taggart et al., 2020). In addition, upregulation of PPR proteins SOT1, EMB2654, PPR4 and  
332 PPR2 (which all promote chloroplast rRNA maturation), and GUN1 (implicated in the  
333 production of chloroplast ribosomal subunits RPS1 and RPL11) present further evidence of  
334 compensatory responses to reduced ribosome abundance and protein synthesis within  
335 *not4a* chloroplasts (Figure S6B)(Aryamanesh et al., 2017; Lee et al., 2019; Lu et al., 2011;  
336 Tadini et al., 2016; Wu et al., 2016).

337

### 338 **PGR3 can rescue the chloroplast associated defects in *not4a***

339 Our data indicate that the *not4a* defects in chloroplast ribosome abundance, protein  
340 translation and photosynthetic function are due to loss of *PGR3* expression in this mutant.  
341 We therefore investigated if reintroducing PGR3 in *not4a* can revert these phenotypes by  
342 transforming *pPGR3::PGR3-YFP* constructs into the mutant and Col-0. PGR3-YFP protein  
343 levels were comparable across the Col-0 and *not4a* lines, whilst *PGR3* transcripts were  
344 elevated between 2-and 6-fold above WT levels in all transgenics, with *YFP*-specific qPCR  
345 corroborating the proportional pattern of expression between lines (Figures 7A, B and S7A).  
346 Interestingly, when compared to their untransformed backgrounds, two of the three Col-0  
347 (lines 1 and 2) and all *not4a* transgenics had higher transcript levels than attributable to the

348 double *PGR3* gene copy number expected, suggesting *pPGR3::PGR3-YFP* is uncoupled  
349 from normal endogenous control (Figure 7B).

350

351 *PGR3-YFP* localized as expected within chloroplasts in both backgrounds (Figure 7C and  
352 S7B). Since NOT4 homologs function as *bona fide* E3 ubiquitin ligases to control  
353 proteasomal degradation of substrates in other organisms, and given that the NOT4A RING  
354 mutant is non-functional in Arabidopsis (Figure 5), we tested if NOT4A might target *PGR3* to  
355 the UPS. Inhibition of protein synthesis using cycloheximide (CHX) did not impact upon  
356 *PGR3-YFP* abundance in WT or *not4a* lines, nor did proteasome inhibition with bortezomib  
357 (BZ) enhance its stability, indicating *PGR3* is not a proteolytic target of NOT4A E3 ligase  
358 activity (Figure 7F). This is further supported by an absence of a protein-protein interaction  
359 between NOT4A and *PGR3* when assayed by yeast-two hybrid (Figure 7G).

360

361 Remarkably however, introduction of the *pPGR3::PGR3-YFP* transgene was able to  
362 complement the pale-yellow and lincomycin-sensitive phenotypes of *not4a* (Figure 7D and  
363 E). Given that we have shown it is possible to express functional *PGR3* driven by its native  
364 promoter in the *not4a* mutant, we backcrossed *not4a* to WT Col-0 and reselected for the  
365 *not4a* mutation to ensure the endogenous *PGR3* was not aberrant, and showed that the  
366 *not4a* phenotype persisted in backcrossed plants bred to homozygosity for the T-DNA insert.  
367 This, along with our prior observation that reintroduction of WT *pNOT4A::NOT4A-GUS* into  
368 *not4a* can restore *PGR3* transcript levels (Figures 1C, 4A and 6B), indicates NOT4A is  
369 required for *PGR3* expression and suggests that the inclusion of c-terminal YFP and/or a  
370 lack of regulatory elements in the reintroduced *pPGR3::PGR3* construct decouples *PGR3*  
371 regulation from NOT4A control in the mutant. This scenario is further supported by increased  
372 accumulation of *PGR3* transcripts in the Col-0 and *not4a pPGR3::PGR3* transgenic lines  
373 relative to WT (Figure 7B).

374

375

## 376 Discussion

377 As essential components of the gene expression machinery in plastids, nuclear encoded  
378 PPR proteins must be dynamically controlled in order to meet the fluctuating demands of the  
379 light-harvesting chloroplast organelle. However, comparatively little is known about how PPR  
380 proteins are regulated. Here we show that expression of *PGR3*, a large PPR protein that  
381 regulates chloroplast ribosome biogenesis through promoting the translation of core  
382 chloroplast-encoded 30S subunits, is regulated by the cytosolic E3 ubiquitin ligase NOT4A.

383 We found that *not4a* mutants have photosynthetic and growth defects that are a  
384 consequence of reduced plastid ribosome biogenesis. Transcripts encoding *PGR3* are  
385 undetectable in *not4a*, and *pgr3* mutants share functional defects in chloroplast activity.  
386 Remarkably, *not4a* chloroplast function was restored by introducing *PGR3*-YFP expressed  
387 from the endogenous *PGR3* promoter sequence. The transgene led to higher *PGR3*  
388 transcript abundance in both Col-0 and *not4a* lines relative to that of WT plants. Based on  
389 known activities of NOT4 in yeast and mammals, we postulate that NOT4A is required to  
390 suppress negative regulation of *PGR3* expression at regulatory sequences outside of the  
391 reintroduced *PGR3*-encoding transgene, such as the 3' UTR or distal elements, and that this  
392 regulation may act to integrate and transduce chloroplast stress signals to fine-tune plastid  
393 protein biosynthesis through modulating *PGR3* abundance.

394

395 NOT4-like proteins are unique amongst E3 ubiquitin-ligases, in that they consist of both a  
396 RING domain and an RNA binding RRM domain (Cano et al., 2010). We showed that both of  
397 these domains in NOT4A are required for *PGR3* expression, but the molecular connection  
398 between NOT4A and *PGR3* is yet to be defined. Whilst the repetitive domain structures of  
399 the PPR proteins enable precise and selective RNA binding, they may present a  
400 translational challenge to ribosomes. Two profiling studies of the Arabidopsis RNA  
401 degradome taken together, identified five PPR genes as targets for co-translational mRNA  
402 decay, with further analysis identifying three nucleotide periodicity within one PPR transcript  
403 suggesting ribosome stalling (Hou et al., 2016; Yu et al., 2016). *PGR3* is the second largest  
404 and most structurally repetitive (containing 25 repeats, determined by RADAR (Madeira et  
405 al., 2019)) of the 34 DEG chloroplast targeted PPR genes in *not4a*. Significantly, Mammalian  
406 NOT4 was found to bind stalled ribosome complexes undertaking co-translational import into  
407 damaged mitochondria, initiating quality control, and ultimately mitophagy (Wu et al., 2018).  
408 Hence, potential co-translational regulation of *PGR3* transcripts by NOT4A warrants further  
409 investigation in plants.

410

411 In other organisms NOT4 contributes to post-transcriptional control as a component of the  
412 CCR4-NOT complex, central to 3' deadenylation and mRNA decay, and in Arabidopsis, RNA  
413 binding activities of NOT4B and NOT4C were previously observed in a proteome-wide  
414 survey of RNA-binding proteins (Marondedze et al., 2016). Although the presence of the  
415 CCR4-NOT complex has yet to be established in plants, a recent proteomic characterisation  
416 of Target of rapamycin (TOR) signalling in Arabidopsis identified NOT4A as a TOR target,  
417 and NOT4B as an LST8 interactor along with other conserved CCR4-NOT core subunits,

418 suggesting the plant NOT4s may indeed be implicated in mRNA decay within this complex  
419 (Van Leene et al., 2019). Furthermore, in humans and *Drosophila*, NOT4 contains a C-  
420 terminal sequence required for binding to the CCR4-NOT linker protein CAF40; a similar  
421 sequence was identified in *Arabidopsis* NOT4A (Keskeny et al., 2019). Notably, *Drosophila*  
422 NOT4 competes for the same CAF40 binding site as 3'UTR RNA binding proteins, BAG of  
423 MARBLES (BAM) and Roquin-1 (Keskeny et al., 2019; Sgromo et al., 2018; 2017). If  
424 functional BAM or Roquin-1 homologues exist in plants, NOT4A may inhibit the 3'UTR  
425 recruitment of *PGR3* to mRNA decay in plants. Exploring the *in vivo* targets of E3 ligase and  
426 RNA binding activities of all three *Arabidopsis* NOT4 proteins, in addition to determining their  
427 association and function within a putative CCR4 NOT complex, will help to shed light not  
428 only on how NOT4A regulates *PGR3* expression, but also how these enigmatic E3 ubiquitin  
429 ligases influence other aspects of plant biology.

430

## 431 **Materials and methods**

432

### 433 **Arabidopsis growth and transgenic lines**

434 Seed were sown on compost mixed to a ratio 4:2:1 of Levington F2 compost, vermiculite and  
435 perlite, or sterile half strength Murashige & Skoog (MS) medium with 0.8% agar made with  
436 purified water and autoclaved for 15 minutes at 121°C. Plants were grown in Weiss Technik  
437 fitotron SGC 120 biological chambers with 16 hours light/ 8 hours dark cycles at 22°C (long  
438 day), or 12 hours light/ 12 hours dark at 22°C (short day).

439 T-DNA insertion mutants were identified from the GABI-KAT *not4a*  
440 (GABI\_134E03)(Kleinboelting et al., 2012), SALK *not4b* (SALK\_079194)(Alonso et al.,  
441 2003), SAIL *not4c* (SAIL\_274\_D03)(Sessions et al., 2002), collections from the Nottingham  
442 *Arabidopsis* Stock Centre (NASC) and the *pgr3-4* (line FLAG 086D06) from the Versailles  
443 *Arabidopsis thaliana* Stock Center (Rojas et al., 2018). Homozygous T-DNA insertions were  
444 identified by PCR with primers designed by T-DNA express and null expression confirmed  
445 by RT-PCR (Figure S2A and B).

446 *Arabidopsis* lines were transformed with the genomic sequences of *NOT4A* and  
447 *PGR3* plus ~2KB of the upstream promoters cloned into Invitrogen pENTR™/D-TOPO™  
448 (ThermoFisher- K240020) (For primer sequences see Data sheet 3) and sequenced before  
449 ligations into pGWB533 and pGWB540 constructs respectively (Nakagawa et al., 2007),  
450 using the *Agrobacterium tumefaciens* (GV3101 pMP90) floral dip method (Zhang et al.,  
451 2006).

452

### 453 **Histochemical staining**

454 GUS staining was performed using 1% potassium ferricyanide and potassium ferrocyanide  
455 added to the GUS stain solution (0.1M PBS, pH 7.0, 2mM X-gluc and Triton-X-100 (0.1%  
456 v/v) (Jefferson et al., 1987). Seedlings were submerged in 1 ml of GUS stain solution and  
457 were incubated at 37°C in the dark for 24 hours. GUS stain solution was replaced by 1 ml of  
458 fixative (3:1 ethanol:acetic acid, 1% Tween v/v). Samples were incubated at room  
459 temperature with gentle shaking and fixative refreshed until tissues appeared cleared.  
460 Cleared samples were then mounted onto microscope slides in 50% glycerol and images  
461 captured with a bifocal light microscope.

462 Starch content was assessed using Lugol's iodine staining of 6 week old short day  
463 grown rosette leaves as described (Tsai et al., 2009). Tissue was pre-cleared with ethanol  
464 and washed in distilled water before adding Lugol's solution with rocking at room  
465 temperature (6mM iodine, 43mM KI, and 0.2M HCl), this was then washed with distilled  
466 water until clear.

467

#### 468 **Phenotypic assays**

469 Flowering time determined from 12 plants per line, grown under short and long day  
470 conditions. Plants were assessed daily, once a bolt of >1cm was produced the number of  
471 rosette leaves and day number was recorded.

472 Lincomycin sensitivity was assayed on half MS agar plates supplemented with 10 $\mu$ M.  
473 Lincomycin hydrochloride monohydrate (VWR- ALEXBML-A240). Sterilised seed were  
474 plated and stratified for 48 hours, then grown for 7-10 days with 16 hour light/ 8 hour dark  
475 cycles at 22°C.

476 Chlorophyll was quantified from 60mg of frozen adult leaf tissue. 1.8ml of DMF at 4°C  
477 was added and tubes inverted twice and incubated for 16 hours at 4°C. Absorbance was  
478 measured using BMG labtech FLUOstar OPTIMA spectrometer at 664.5nm 647nm for four  
479 biological replicates per line, chlorophyll content calculated as (Wellburn, 1994).

480

#### 481 **RNA seq analysis**

482 RNA was extracted using Qiagen Plant RNAeasy extraction kit as per manufacturers  
483 guidelines. RNA degradation and contamination was monitored on 1% agarose gels.  
484 Transcriptome sequencing and analysis was performed by Novogene. RNA purity was  
485 checked using the NanoPhotometer<sup>®</sup> spectrophotometer (IMPLEN, CA, USA). RNA  
486 concentration was measured using Qubit<sup>®</sup> RNA Assay Kit in Qubit<sup>®</sup> 2.0 Fluorometer (Life  
487 Technologies, CA, USA). RNA integrity was assessed using the RNA Nano 6000 Assay Kit  
488 of the Bioanalyzer 2100 system (Agilent Technologies, CA, USA). A total amount of 3  $\mu$ g

489 RNA per sample was used as input material for the RNA sample preparations. Sequencing  
490 libraries were generated using NEBNext® UltraTM RNA Library Prep Kit for Illumina® (NEB,  
491 USA) following manufacturer's recommendations. mRNA was purified from total RNA using  
492 poly-T oligo-attached magnetic beads. Fragmentation was carried out using divalent cations  
493 under elevated temperature in NEBNext First Strand Synthesis Reaction Buffer(5X). First  
494 strand cDNA was synthesized using random hexamer primer and M-MuLV Reverse  
495 Transcriptase (RNase H<sup>-</sup>). Second strand cDNA synthesis was subsequently performed  
496 using DNA Polymerase I and RNase H. Remaining overhangs were converted into blunt  
497 ends via exonuclease/polymerase activities. After adenylation of 3' ends of DNA fragments,  
498 NEBNext Adaptor with hairpin loop structure were ligated to prepare for hybridization. In  
499 order to select cDNA fragments of preferentially 150~200 bp in length, the library fragments  
500 were purified with AMPure XP system (Beckman Coulter, Beverly, USA). Then 3 µl USER  
501 Enzyme (NEB, USA) was used with size-selected, adaptor-ligated cDNA at 37°C for 15 min  
502 followed by 5 min at 95 °C before PCR. Then PCR was performed with Phusion High-  
503 Fidelity DNA polymerase, Universal PCR primers and Index (X) Primer. At last, PCR  
504 products were purified (AMPure XP system) and library quality was assessed on the Agilent  
505 Bioanalyzer 2100 system. The clustering of the index-coded samples was performed on a  
506 cBot Cluster Generation System using HiSeq PE Cluster Kit cBot-HS (Illumina) according to  
507 the manufacturer's instructions. After cluster generation, the library preparations were  
508 sequenced on an Illumina Hiseq platform and 125 bp/150 bp paired-end reads were  
509 generated.

510 Raw data (raw reads) of fastq format were firstly processed through in-house perl scripts. In  
511 this step, clean data (clean reads) were obtained by removing reads containing adapter,  
512 reads containing ploy-N and low quality reads from raw data. At the same time, Q20, Q30  
513 and GC content the clean data were calculated. All the downstream analyses were based on  
514 the clean data with high quality. Reference genome and gene model annotation files were  
515 downloaded from genome website directly. Index of the reference genome was built using  
516 Bowtie v2.2.3 and paired-end clean reads were aligned to the reference genome using  
517 TopHat v2.0.12. We selected TopHat as the mapping tool for that TopHat can generate a  
518 database of splice junctions based on the gene model annotation file and thus a better  
519 mapping result than other non-splice mapping tools. HTSeq v0.6.1 was used to count the  
520 reads numbers mapped to each gene. And then FPKM of each gene was calculated based  
521 on the length of the gene and reads count mapped to this gene. FPKM, expected number of  
522 Fragments Per Kilobase of transcript sequence per Millions base pairs sequenced,  
523 considers the effect of sequencing depth and gene length for the reads count at the same  
524 time, and is currently the most commonly used method for estimating gene expression levels

525 (Trapnell et al., 2010). Differential expression analysis of two conditions/groups (two  
526 biological replicates per condition) was performed using the DESeq R package (1.18.0).  
527 DESeq provide statistical routines for determining differential expression in digital gene  
528 expression data using a model based on the negative binomial distribution. The resulting P-  
529 values were adjusted using the Benjamini and Hochberg's approach for controlling the false  
530 discovery rate. Genes with an adjusted P-value <0.05 found by DESeq were assigned as  
531 differentially expressed. Gene Ontology (GO) enrichment analysis of differentially expressed  
532 genes was implemented using AgriGO (Tian et al., 2017).

533

### 534 **Quantitative RT-PCR**

535 Arabidopsis seedlings were frozen in liquid nitrogen and ground to a fine powder. RNA was  
536 extracted using the Qiagen Plant RNAeasy kit as per manufacturers recommendations. RNA  
537 was quantified using a Thermo Scientific NanoDrop™ 1000 Spectrophotometer. 1.5µg of  
538 RNA was treated with RQ1 DNase (Promega- M6101) as per manufacturers  
539 recommendations. cDNA was synthesized using oligo dT or random hexamers (for analysis  
540 of chloroplast encoded petL and -G transcripts) and SuperScript® II Reverse Transcriptase.  
541 cDNA was assessed for genomic DNA contamination using intron spanning primers for  
542 *ACTIN7*. Quantitative PCR primers were designed using the NCBI primer BLAST (Geer et  
543 al., 2010) and primer annealing was tested using gradient PCR. Relative expression was  
544 compared between genotypes and treatments using target primers and primers to the  
545 housekeeping gene *ACTIN7* for normalization (For primer sequences see, Data sheet 3).  
546 Agilent Brilliant III SYBR was used in conjunction with Agilent Aria MX qPCR machine and  
547 analysis performed using the  $\Delta\Delta CT$  comparative quantification method (Livak and  
548 Schmittgen, 2001).

549

### 550 **rRNA analysis**

551 Total RNA was extracted and quantified as described above and run on an Agilent  
552 Tapestation 2200. The concentration of RNA peaks of appropriate sizes corresponding to  
553 the abundant ribosomal RNAs (23S, 23Sb, 18S and 28S) were determined with provided  
554 software normalized to a RNA ladder standard. As no differences in cytosolic ribosome  
555 abundance was observed in the mutants, 18S rRNA was used to normalize chloroplast  
556 rRNA concentrations within samples to aid comparison between genotypes.

557

### 558 **Western blotting**

559 The BIORAD Mini PROTEAN system was used for gel casting, running and transfer. 10%  
560 polyacrylamide gels (resolving gel: 0.38 M tris-HCl pH 8.8, 10% (w/v) acrylamide 0.1% (w/v)



561 SDS, 0.05% (w/v) APS, 0.07% TEMED; stacking gel: 132 mM tris-HCl pH 6.8, 4% (w/v)  
562 acrylamide, 0.1% (w/v) SDS, 0.05% (w/v) APS, 0.15% (v/v) TEMED) were used to separate  
563 protein samples by gel electrophoresis. Separated proteins were transferred to PVDF  
564 membranes overnight at 4°C. Blotted membranes were blocked with 5% Marvel semi-  
565 skimmed milk in TBST for one hour. Membranes were probed with primary antibodies [anti-  
566 LHCA4, RubL, UGPase (Agrisera- AS01 008, AS03 037A, AS05 086),  $\beta$ -Glucuronidase (N-  
567 Terminal (Sigma- G5420), GFP (Roche- 11814460001), Puromycin (Merk- MABE343),  
568 diluted 1:1000-1:5000 in TBST for three hours. Membranes washed three times for 5 minute  
569 in TBST. Membranes were probed with appropriate secondary antibodies, anti-Rabbit-Hrp,  
570 anti-Mouse-Hrp (Sigma A0545, A9917) diluted in TBST for one hour. Membranes were  
571 washed three times for 5 minutes in TBST. Membranes were incubated with Pierce™ ECL  
572 Western Blotting Substrate (Thermo Scientific- 32106) for one minute. Membranes were  
573 exposed to X-ray film (FUJIFILM SUPER RX) in a HI-SPEED-X intensifying screen binder in  
574 a dark room. Films were developed with an Xograph Compact X4 Automated Processor and  
575 photographed on a light box with a Nikon D40 SLR camera.

576

### 577 **Chloroplast isolations**

578 Chloroplasts were isolated from short day grown plants as (Kley et al., 2010). Two tubes  
579 containing 2g of fresh rosette leaf per sample were mixed with 23ml of chilled 1X isolation  
580 buffer each (0.6M sorbitol, 0.1M HEPES, 10mM EDTA, 10mM EGTA, 2mM MgCl<sub>2</sub>, 20mM  
581 NaHCO<sub>3</sub> and 1mM DTT). Tissue was blended 3 times for 10 seconds with IKA T25 digital  
582 Ultra TURRAX at speed setting 3. Homogenate was poured into pre-wetted 38 $\mu$ m pore  
583 polyester mesh and filtered again through double layer of pre-wetted 22 $\mu$ m pore nylon cloth.  
584 Suspension was gently load onto two prepared falcon tubes containing equal volumes of 2X  
585 isolation buffer and Percoll™ (GE Healthcare- 17-0891-02). Samples were centrifuged in a  
586 swing bucket centrifuge at 1200Xg for 10 minutes with brakes off. Upper layers were and  
587 pellet washed with 8ml 1X isolation buffer, inverting to mix. Samples were centrifuged again  
588 at 1000Xg for 5 minutes. Supernatants were removed using serological pipette and  
589 discarded. Pellets were resuspended in 5ml 1X isolation buffer loaded gently onto a 50%  
590 percoll isolation buffer. Samples were centrifuged at 1200Xg for 10 minutes with brakes off.  
591 Upper layers removed with a serological pipette. Pellets were washed with 10ml 1X isolation  
592 buffer, inverting to mix. Samples were centrifuged at 1000Xg for 5 and supernatant.  
593 Samples were centrifuged one final time at 1000Xg and remaining supernatant removed.  
594 Chloroplast pellets were frozen in liquid nitrogen. Proteins were solubilized in 2Xlaemml  
595 buffer and quantified with the Biorad RC DC™ protein quantification assay.

596 For chloroplast puromycin incorporation assays chloroplast enrichment was  
597 undertaken as above with the following adjustments: DTT excluded from isolation buffer.  
598 After the second percoll gradient chloroplast enriched pellets were washed once in  
599 resuspension buffer (1.6M sorbitol, 0.1M HEPES, 2.5mM EDTA, 2.5mM EGTA, 0.5mM  
600 MgCl<sub>2</sub>, 20mM NaHCO<sub>3</sub>). Supernatants were removed and pellet resuspended in 2ml of fresh  
601 resuspension buffer. 0.4ml was taken for time-point 0 before adding 1.6µl of 50mM  
602 Puromycin dihydrochloride (Sigma- P8833), resuspensions were incubated in low light for 2  
603 hours, 0.4ml was taken at each time-point and centrifuged at 12000Xg for 1 minute,  
604 supernatants removed and pellet snap frozen in liquid nitrogen. Protein extracts were  
605 prepared as above.

606

#### 607 **Thylakoid composition analysis- Blue native gels and 2Ds**

608 Thylakoids were isolated from 5-week-old plants grown in 8 h light/ 16 h dark at  
609 photosynthetic photon flux density (PPFD) of 100 µmol m<sup>-2</sup> s<sup>-1</sup>, 50 % humidity, +23 °C, as  
610 described in (Koskela et al., 2018). Protein concentration was determined using BioRad's  
611 DC Protein assay according to the manufacturer's protocol.

612 Isolated thylakoids were diluted with ice-cold 25BTH20G [25 mM BisTris/HCl (pH  
613 7.0), 20% (w/v) glycerol and 0.25 mg/ml Pefabloc, 10 mM NaF] buffer to a concentration of  
614 10 mg protein/mL. An equal volume of detergent solution (β-dodecyl maltoside (DM) in BTH  
615 buffer) was added to a final concentration of 1% w/v. The membranes were solubilized 5 min  
616 on ice and the insolubilized material was removed by centrifugation at 18 000 x g at 4°C for  
617 20 min. The supernatant was supplemented with Serva Blue G buffer [100 mM BisTris/HCl  
618 (pH 7.0), 5 M ACA, 30 %(w/v) sucrose and 50 mg/mL Serva Blue G] to introduce negative  
619 charge to the protein complexes. The Blue native (BN) gel (3.5-12.5% acrylamide) were  
620 prepared as described in Järvi et al 2011. The protein complexes from the sample were  
621 separated by the BN gel and the individual subunits further resolved with 2D-SDS-PAGE  
622 (12% acrylamide, 6 M urea) as in Järvi et al 2011). The proteins were visualized with  
623 SYPRO® Ruby staining according to Invitrogen Molecular Probes™ instructions, or with  
624 silver staining (Blum, 1987).

625

#### 626 **Dual PAM measurements**

627 Dual-PAM measurements were performed with Dual-PAM-100 (Heinz Walz GmbH)  
628 equipped with DUAL-E emitter and DUAL-DR detector units, using a red measuring beam  
629 for fluorescence and red actinic light. Simultaneously, the oxidation state of P700 was  
630 monitored by measuring the difference of the 875 nm and 830 nm transmittance signals.  
631 Prior to the measurements plants were dark-adapted for 30 min and F<sub>0</sub>, F<sub>M</sub> and P<sub>M</sub> were

632 determined according to the Dual-PAM-100 protocol. For the light curve measurements the  
633 plants were subjected to illumination steps of 3 min at light intensities of 25-1000  $\mu\text{mol}$   
634  $\text{photons m}^{-2} \text{s}^{-1}$  followed by a saturating flash (700 ms) to determine  $F_M$  and  $P_M$ . For the  
635 induction curve, dark-adapted plants were illuminated with 1000  $\mu\text{mol photons m}^{-2} \text{s}^{-1}$  actinic  
636 light and a saturating flash was applied every 2 min. The quantum yield of PSII (Y(II)) was  
637 calculated (Genty et al., 1989) from the fluorescence data, while the P700 signal was used  
638 for the quantum yield of PSI (Y(I)) (Klughammer and Schreiber, 2008). The relative rates of  
639 electron transfer through PSII and PSI, ETR(II) and ETR (I), respectively, were calculated as  
640  $Y(\text{II}) \times \text{PPFD} \times 0.84 \times 0.5$  and  $Y(\text{I}) \times \text{PPFD} \times 0.84 \times 0.5$ .

641

#### 642 **Quantitative proteome analysis**

643 Col-0 and *not4a* plants were grown on  $\frac{1}{2}$  MS medium, supplemented with 0.8% sugar, for  
644 30d under short day conditions. Plant material from three independent biological replicates  
645 was homogenized in Rensink extraction buffer (50 mM Tris/HCl pH 7.5, 100 mM NaCl, 0.5%  
646 (v/v) TritonX-100, 2 mM DTT and protease inhibitor cocktail (Sigma-Aldrich)). LC separation  
647 and HD-MSE data acquisition was performed as previously described (Helm et al., 2014). In  
648 short, 100 $\mu\text{g}$  protein were digested in solution with RapiGest<sup>TM</sup> with 1  $\mu\text{g}$  Trypsin  
649 (Promega) over night. Peptide pellets were dissolved in 2% (v/v) ACN, 0.1% (v/v) FA, and  
650 subjected to LC on an ACQUITY UPLC System coupled to a Synapt G2-S mass  
651 spectrometer (Waters, Eschborn, Germany). For quantification, the sample was spiked with  
652 10 fmol rabbit glycogen phosphorylase and the abundance of the three most intense peptide  
653 ions were used as a reference value for 10 fmol (Hi-3 method, Silva et al., 2006). Data  
654 analysis and quantification was carried out by ProteinLynx Global Server (PLGS 3.0.1,  
655 Apex3D algorithm v. 2.128.5.0, 64 bit, Waters, Eschborn, Germany) with automated  
656 determination of chromatographic peak width as well as MS TOF resolution. Database query  
657 was as follows: Peptide and fragment tolerances were set to automatic, two fragment ion  
658 matches per peptide, five fragment ions for protein identification, and two peptides per  
659 protein were required for identification. Primary digest reagent was trypsin with one missed  
660 cleavage allowed. The false discovery rate (FDR) was set to 4% at the protein level. MSE  
661 data were searched against the modified *A. thaliana* database (TAIR10,  
662 <ftp://ftp.arabidopsis.org>) containing common contaminants such as keratin  
663 (<ftp://ftp.thegpm.org/fasta/cRAP/crap.fasta>). All quantitative proteomics data were obtained  
664 with three independent biological replicates that were measured in three technical replicates  
665 each, giving rise to nine measurements per sample. Mapman was used to assign proteins to  
666 functional groups (Thimm et al., 2004). Statistical testing was based on a two-sided T-test  
667 (Helm et al., 2014).

668

### 669 **Photoinhibition assays**

670 Detached leaves of mature plants grown under standard conditions for five weeks were  
671 floated on water or 2.3 mM lincomycin for 16 h in darkness after which they were illuminated  
672 under with high light of 1000  $\mu\text{mol photons m}^{-2} \text{s}^{-1}$  for 1.5 h. Thereafter, the water samples  
673 were moved to standard growth conditions for recovery. PSII efficiency ( $F_V/F_M$ ) was  
674 measured after a 20 min dark-adaptation using FluorPen FP 110 (Photon Systems  
675 Instruments). The amount of D1 protein was measured by western blotting with protein  
676 samples collected at indicated timepoints. Total protein samples were isolated by  
677 homogenizing frozen leaf material in 100 mM Tris-HCl pH 8.0, 50 mM Na-EDTA, 0.25 mM  
678 NaCl, 0.75 (w/v) % SDS, 1 mM DTT followed by 10 min incubation at 68 °C. The extracts  
679 were clarified by centrifugation at 12 000 x g for 10 min. Protein concentration was  
680 determined using BioRad's DC Protein assay according to the manufacturer's protocol.  
681 Solubilized protein samples were separated by SDS-PAGE (12% acrylamide, 6 M urea) and  
682 immunoblotted with rabbit D1 DE-loop antibody (Kettunen et al., 1996) used as a 1:8000  
683 dilution. LI-COR Goat anti-rabbit IRDye® 800CW 2nd antibody was used for detection  
684 according to manufacturer's instructions.

685

### 686 **Confocal Microscopy**

687 4 day old pPGR3::PGR3-YFP expressing seedlings were imaged with a Nikon Ti  
688 microscope connected to an A1R confocal system equipped with a Plan Apochromat 60x/1.2  
689 WI DIC H lens, with 514nm and 637nm laser lines, to image YFP and chlorophyll auto-  
690 fluorescence respectively. Laser power, gain and pinhole settings used were identical  
691 between lines, YFP was imaged prior to chloroplast auto-fluorescence and settings  
692 compared to WT seedlings as a YFP negative control. At least 4 seedlings per genetic  
693 background were imaged.

694

### 695 **Yeast-two hybrid**

696 PGR3 and NOT4A coding sequences were cloned into Invitrogen pENTR™/D-TOPO™  
697 (ThermoFisher- K240020) and sequenced before ligation into pGADCg and pGBKCg  
698 respectively (For primer sequences see, Data sheet 3). Matchmaker (AH109) yeast was  
699 transformed with 1 $\mu\text{g}$  pGADCg and pGBKCg vectors containing NOT4A, PGR3 or empty  
700 vectors as described, in 100 $\mu\text{l}$  TB buffer (2:1 50% PEG 3350MW, 1M Lithium Acetate, 0.6%  
701  $\beta$ -mercaptoethanol). 37°C for 45 minutes and then spread on agar plates containing yeast  
702 Nitrogen Base without Amino acids supplemented with synthetic amino acid Drop out (DO) -  
703 leu-trp agar (Formedium- CYN0401, DSCK172) and grown at 30°C for 2-3 days before

704 resuspending single colonies in 100µl sterile water and transferring 20µl to DO -leu-trp-his-  
705 ade and DO -leu-trp agar plates (Formedium- DSCK272, DSCK172). Plates were grown at  
706 30°C for 2-3 days before photographing with Nikon D40 SLR camera.

707

708

## 709 **Acknowledgments**

710 This work was supported by Biotechnology and Biological Sciences Research Council  
711 grants [BB/M020568/1 and BB/T004002/1] and a European Research Council grant [ERC  
712 Starting Grant 715441-GasPlaNt] to D.J.G, an EMBO Short-Term Fellowship [Grant number  
713 8104] to M.B, Academy of Finland grants [307335 and 321616] for AI, MR and PM, and the  
714 Doctoral Programme in Molecular Life Sciences at the University of Turku (AI). SB gratefully  
715 acknowledges support from the DFG with grant number BA 1902/3-2. We thank Dr  
716 Alessandro Di Mio and the BALM facility at the University of Birmingham for support with  
717 confocal analyses.

## 718 **Author contributions**

719 M.B. and D.J.G. conceived and designed the overall project, and A.I and P.R. designed the  
720 photosynthetic analyses. M.B., A.I., O.A., A.C.P., R.E., A-M.L., R.O., M.R. and D.J.G  
721 performed experiments. J.G and S.B. performed the quantitative proteome analysis. M.B.,  
722 A.I., P.M. and D.J.G. analysed data. M.B and D.J.G wrote the manuscript with input from all  
723 authors.

724

## 725 **References**

726

727 Albert, T.K., Hanzawa, H., Legtenberg, Y.I.A., de Ruwe, M.J., van den Heuvel, F.A.J.,  
728 Collart, M.A., Boelens, R., and Timmers, H.T.M. (2002). Identification of a ubiquitin-protein  
729 ligase subunit within the CCR4-NOT transcription repressor complex. *The EMBO Journal*  
730 *21*, 355–364.

731 Allen, J.F., de Paula, W.B.M., Puthiyaveetil, S., and Nield, J. (2011). A structural  
732 phylogenetic map for chloroplast photosynthesis. *Trends in Plant Science* *16*, 645–655.

733 Alonso, J.M., Stepanova, A.N., Leisse, T.J., Kim, C.J., Chen, H., Shinn, P., Stevenson, D.K.,  
734 Zimmerman, J., Barajas, P., Cheuk, R., et al. (2003). Genome-wide insertional mutagenesis  
735 of *Arabidopsis thaliana*. *Science* *301*, 653–657.

- 736 Archibald, J.M. (2015). Endosymbiosis and Eukaryotic Cell Evolution. *Curr. Biol.* 25, R911–  
737 R921.
- 738 Aro, E.-M., Suorsa, M., Rokka, A., Allahverdiyeva, Y., Paakkarinen, V., Saleem, A.,  
739 Battchikova, N., and Rintamäki, E. (2005). Dynamics of photosystem II: a proteomic  
740 approach to thylakoid protein complexes. *J. Exp. Bot.* 56, 347–356.
- 741 Aryamanesh, N., Ruwe, H., Sanglard, L.V.P., Eshraghi, L., Bussell, J.D., Howell, K.A.,  
742 Small, I., and Francs-Small, des, C.C. (2017). The Pentatricopeptide Repeat Protein  
743 EMB2654 Is Essential for Trans-Splicing of a Chloroplast Small Ribosomal Subunit  
744 Transcript. *Plant Physiology* 173, 1164–1176.
- 745 Barkan, A., and Small, I. (2014). Pentatricopeptide repeat proteins in plants. *Annu Rev Plant*  
746 *Biol* 65, 415–442.
- 747 Belcher, S., Williams-Carrier, R., Stiffler, N., and Barkan, A. (2015). Large-scale genetic  
748 analysis of chloroplast biogenesis in maize. *Biochim. Biophys. Acta* 1847, 1004–1016.
- 749 Bhaskar, V., Basquin, J., and Conti, E. (2015). Architecture of the ubiquitylation module of  
750 the yeast Ccr4-Not complex. *Structure* 23, 921–928.
- 751 Blum, H. (1987). Improved silver staining of plant proteins, RNA and DNA in  
752 polyacrylamide gels. *Electrophoresis* 93–99.
- 753 Bryant, N., Lloyd, J., Sweeney, C., Myouga, F., and Meinke, D. (2011). Identification of  
754 nuclear genes encoding chloroplast-localized proteins required for embryo development in  
755 *Arabidopsis*. *Plant Physiology* 155, 1678–1689.
- 756 Cai, W., Okuda, K., Peng, L., and Shikanai, T. (2011). PROTON GRADIENT REGULATION  
757 3 recognizes multiple targets with limited similarity and mediates translation and RNA  
758 stabilization in plastids. *Plant J.* 67, 318–327.
- 759 Callis, J. (2014). The ubiquitination machinery of the ubiquitin system. *The Arabidopsis Book*  
760 12, e0174.
- 761 Cano, F., Miranda-Saavedra, D., and Lehner, P.J. (2010). RNA-binding E3 ubiquitin ligases:  
762 novel players in nucleic acid regulation. *Biochem. Soc. Trans.* 38, 1621–1626.
- 763 Chen, H., Sirupangi, T., Wu, Z.-H., Johnson, D.L., and Laribee, R.N. (2018). The conserved  
764 RNA recognition motif and C3H1 domain of the Not4 ubiquitin ligase regulate in vivo ligase  
765 function. *Scientific Reports* 1–13.

- 766 Collart, M.A., and Panasenko, O.O. (2012). The Ccr4--not complex. *Gene* 492, 42–53.
- 767 de Bie, P., and Ciechanover, A. (2011). Ubiquitination of E3 ligases: self-regulation of the  
768 ubiquitin system via proteolytic and non-proteolytic mechanisms. *Cell Death Differ.* 18,  
769 1393–1402.
- 770 Dimitrova, L.N., Kuroha, K., Tatematsu, T., and Inada, T. (2009). Nascent peptide-  
771 dependent translation arrest leads to Not4p-mediated protein degradation by the  
772 proteasome. *J. Biol. Chem.* 284, 10343–10352.
- 773 Duttler, S., Pechmann, S., and Frydman, J. (2013). Principles of Cotranslational  
774 Ubiquitination and Quality Control at the Ribosome. *Molecular Cell* 50, 379–393.
- 775 Emanuelsson, O., Brunak, S., Heijne, von, G., and Nielsen, H. (2007). Locating proteins in  
776 the cell using TargetP, SignalP and related tools. *Nat Protoc* 2, 953–971.
- 777 Fujii, S., Sato, N., and Shikanai, T. (2013). Mutagenesis of individual pentatricopeptide  
778 repeat motifs affects RNA binding activity and reveals functional partitioning of Arabidopsis  
779 PROTON gradient regulation3. *Plant Cell* 25, 3079–3088.
- 780 Genty, B., Briantais, J.-M., and Baker, N.R. (1989). The relationship between the quantum  
781 yield of photosynthetic electron transport and quenching of chlorophyll fluorescence. *BBA -*  
782 *General Subjects* 990, 87–92.
- 783 Halter, D., Collart, M.A., and Panasenko, O.O. (2014). The Not4 E3 ligase and CCR4  
784 deadenylase play distinct roles in protein quality control. *PLoS ONE* 9, e86218.
- 785 Helm, S., Dobritsch, D., Rödiger, A., Agne, B., and Baginsky, S. (2014). Protein  
786 identification and quantification by data-independent acquisition and multi-parallel collision-  
787 induced dissociation mass spectrometry (MS(E)) in the chloroplast stroma proteome. *J*  
788 *Proteomics* 98, 79–89.
- 789 Hou, C.Y., Lee, W.C., Chou, H.C., Chen, A.P., Chou, S.J., and Chen, H.M. (2016). Global  
790 Analysis of Truncated RNA Ends Reveals New Insights into Ribosome Stalling in Plants.  
791 *The Plant Cell Online* 28, 2398–2416.
- 792 Järvi, S., Suorsa, M., Paakkarinen, V., and Aro, E.-M. (2011). Optimized native gel systems  
793 for separation of thylakoid protein complexes: novel super- and mega-complexes. *Biochem.*  
794 *J.* 439, 207–214.
- 795 Jefferson, R.A., Kavanagh, T.A., and Bevan, M.W. (1987). GUS fusions: beta-glucuronidase

- 796 as a sensitive and versatile gene fusion marker in higher plants. *The EMBO Journal* 6,  
797 3901–3907.
- 798 Juskiewicz, S., and Hegde, R.S. (2018). Quality Control of Orphaned Proteins. *Molecular*  
799 *Cell* 71, 443–457.
- 800 Keskeny, C., Raisch, T., Sgromo, A., Igreja, C., Bhandari, D., Weichenrieder, O., and  
801 Izaurrealde, E. (2019). A conserved CAF40-binding motif in metazoan NOT4 mediates  
802 association with the CCR4-NOT complex. *Genes & Development* 33, 236–252.
- 803 Kettunen, R., Tyystjärvi, E., and Aro, E.-M. (1996). Degradation pattern of photosystem II  
804 reaction center protein D1 in intact leaves. The major photoinhibition-induced cleavage site  
805 in D1 polypeptide is located amino terminally of the DE loop. *Plant Physiology* 111, 1183–  
806 1190.
- 807 Kleinboelting, N., Huep, G., Kloetgen, A., Viehoveer, P., and Weisshaar, B. (2012). GABI-  
808 Kat SimpleSearch: new features of the *Arabidopsis thaliana* T-DNA mutant database.  
809 *Nucleic Acids Res.* 40, D1211–D1215.
- 810 Kley, J., Heil, M., Muck, A., Svatoš, A., and Boland, W. (2010). Isolating intact chloroplasts  
811 from small *Arabidopsis* samples for proteomic studies. *Analytical Biochemistry* 398, 198–  
812 202.
- 813 Klughammer, C., and Schreiber, U. (2008). Saturation Pulse method for assessment of  
814 energy conversion in PS I. *PAM Application Notes* 1–5.
- 815 Koskela, M.M., Brünje, A., Ivanauskaite, A., Grabsztunowicz, M., Lassowskat, I., Neumann,  
816 U., Dinh, T.V., Sindlinger, J., Schwarzer, D., Wirtz, M., et al. (2018). Chloroplast  
817 Acetyltransferase NSI Is Required for State Transitions in *Arabidopsis thaliana*. *Plant Cell*  
818 30, 1695–1709.
- 819 Lee, K., Park, S.J., Colas des Francs Small, C., Whitby, M., Small, I., and Kang, H. (2019).  
820 The coordinated action of PPR4 and EMB2654 on each intron half mediates trans-splicing of  
821 rps12 transcripts in plant chloroplasts. *The Plant Journal* 100, 1193–1207.
- 822 Lee, S., Lee, D.W., Lee, Y., Mayer, U., Stierhof, Y.-D., Lee, S., Jürgens, G., and Hwang, I.  
823 (2009). Heat shock protein cognate 70-4 and an E3 ubiquitin ligase, CHIP, mediate plastid-  
824 destined precursor degradation through the ubiquitin-26S proteasome system in  
825 *Arabidopsis*. *Plant Cell* 21, 3984–4001.



- 826 Li, L., Aro, E.-M., and Millar, A.H. (2018). Mechanisms of Photodamage and Protein  
827 Turnover in Photoinhibition. *Trends in Plant Science* 23, 667–676.
- 828 Ling, Q., and Jarvis, P. (2015). Regulation of Chloroplast Protein Import by the Ubiquitin E3  
829 Ligase SP1 Is Important for Stress Tolerance in Plants. *Current Biology* 25, 2527–2534.
- 830 Ling, Q., Broad, W., Trösch, R., Töpel, M., Demiral Sert, T., Lymperopoulos, P., Baldwin, A.,  
831 and Jarvis, R.P. (2019). Ubiquitin-dependent chloroplast-associated protein degradation in  
832 plants. *Science* 363, eaav4467–14.
- 833 Ling, Q., Huang, W., Baldwin, A., and Jarvis, P. (2012). Chloroplast biogenesis is regulated  
834 by direct action of the ubiquitin-proteasome system. *Science* 338, 655–659.
- 835 Livak, K.J., and Schmittgen, T.D. (2001). Analysis of relative gene expression data using  
836 real-time quantitative PCR and the 2(-Delta Delta C(T)) Method. *Methods* 25, 402–408.
- 837 Lu, Y., Li, C., Wang, H., Chen, H., Berg, H., and Xia, Y. (2011). AtPPR2, an Arabidopsis  
838 pentatricopeptide repeat protein, binds to plastid 23S rRNA and plays an important role in  
839 the first mitotic division during gametogenesis and in cell proliferation during embryogenesis.  
840 *The Plant Journal* 67, 13–25.
- 841 Madeira, F., Park, Y.M., Lee, J., Buso, N., Gur, T., Madhusoodanan, N., Basutkar, P., Tivey,  
842 A.R.N., Potter, S.C., Finn, R.D., et al. (2019). The EMBL-EBI search and sequence analysis  
843 tools APIs in 2019. *Nucleic Acids Res.* 47, W636–W641.
- 844 Manna, S. (2015). An overview of pentatricopeptide repeat proteins and their applications.  
845 *Biochimie* 113, 93–99.
- 846 Marondedze, C., Thomas, L., Serrano, N.L., Lilley, K.S., and Gehring, C. (2016). The RNA-  
847 binding protein repertoire of Arabidopsis thaliana. *Scientific Reports* 6, 29766.
- 848 Mulder, K.W., Inagaki, A., Cameroni, E., Mousson, F., Winkler, G.S., De Virgilio, C., Collart,  
849 M.A., and Timmers, H.T.M. (2007). Modulation of Ubc4p/Ubc5p-Mediated Stress Responses  
850 by the RING-Finger-Dependent Ubiquitin-Protein Ligase Not4p in *Saccharomyces*  
851 *cerevisiae*. *Genetics* 176, 181–192.
- 852 Myouga, F., Akiyama, K., Motohashi, R., Kuromori, T., Ito, T., Iizumi, H., Ryusui, R., Sakurai,  
853 T., and Shinozaki, K. (2010). The Chloroplast Function Database: a large-scale collection of  
854 Arabidopsis Ds/Spm- or T-DNA-tagged homozygous lines for nuclear-encoded chloroplast  
855 proteins, and their systematic phenotype analysis. *Plant J.* 61, 529–542.

- 856 Myouga, F., Akiyama, K., Tomonaga, Y., Kato, A., Sato, Y., Kobayashi, M., Nagata, N.,  
857 Sakurai, T., and Shinozaki, K. (2013). The Chloroplast Function Database II: a  
858 comprehensive collection of homozygous mutants and their phenotypic/genotypic traits for  
859 nuclear-encoded chloroplast proteins. *Plant and Cell Physiology* 54, e2.
- 860 Nakagawa, T., Kurose, T., Hino, T., Tanaka, K., Kawamukai, M., Niwa, Y., Toyooka, K.,  
861 Matsuoka, K., Jinbo, T., and Kimura, T. (2007). Development of series of gateway binary  
862 vectors, pGWBs, for realizing efficient construction of fusion genes for plant transformation.  
863 *J. Biosci. Bioeng.* 104, 34–41.
- 864 Panasencko, O.O., and Collart, M.A. (2011). Not4 E3 ligase contributes to proteasome  
865 assembly and functional integrity in part through Ecm29. *Molecular and Cellular Biology* 31,  
866 1610–1623.
- 867 Preissler, S., Reuther, J., Koch, M., Scior, A., Bruderek, M., Frickey, T., and Deuerling, E.  
868 (2015). Not4-dependent translational repression is important for cellular protein homeostasis  
869 in yeast. *The EMBO Journal* 34, 1905–1924.
- 870 Rantala, M., Tikkanen, M., and Aro, E.-M. (2017). Proteomic characterization of hierarchical  
871 megacomplex formation in Arabidopsis thylakoid membrane. *Plant J.* 92, 951–962.
- 872 Rojas, M., Ruwe, H., Miranda, R.G., Zoschke, R., Hase, N., Schmitz-Linneweber, C., and  
873 Barkan, A. (2018). Unexpected functional versatility of the pentatricopeptide repeat proteins  
874 PGR3, PPR5 and PPR10. *Nucleic Acids Res.* 46, 10448–10459.
- 875 Sadanandom, A., Bailey, M., Ewan, R., Lee, J., and Nelis, S. (2012). The ubiquitin-  
876 proteasome system: central modifier of plant signalling. *New Phytol* 196, 13–28.
- 877 Schmitz-Linneweber, C., and Small, I. (2008). Pentatricopeptide repeat proteins: a socket  
878 set for organelle gene expression. *Trends in Plant Science* 13, 663–670.
- 879 Sessions, A., Burke, E., Presting, G., Aux, G., McElver, J., Patton, D., Dietrich, B., Ho, P.,  
880 Bacwaden, J., Ko, C., et al. (2002). A high-throughput Arabidopsis reverse genetics system.  
881 *The Plant Cell Online* 14, 2985–2994.
- 882 Sgromo, A., Raisch, T., Backhaus, C., Keskeny, C., Alva, V., Weichenrieder, O., and  
883 Izaurrealde, E. (2018). Drosophila Bag-of-marbles directly interacts with the CAF40 subunit of  
884 the CCR4-NOT complex to elicit repression of mRNA targets. *Rna* 24, 381–395.
- 885 Sgromo, A., Raisch, T., Bawankar, P., Bhandari, D., Chen, Y., Kuzuoğlu-Öztürk, D.,

- 886 Weichenrieder, O., and Izaurre, E. (2017). A CAF40-binding motif facilitates recruitment  
887 of the CCR4-NOT complex to mRNAs targeted by Drosophila Roquin. *Nat Commun* 8,  
888 14307–14316.
- 889 Shemorry, A., Hwang, C.-S., and Varshavsky, A. (2013). Control of Protein Quality and  
890 Stoichiometries by N-Terminal Acetylation and the N-End Rule Pathway. *Molecular Cell* 50,  
891 540–551.
- 892 Shen, G., Adam, Z., and Zhang, H. (2007a). The E3 ligase AtCHIP ubiquitylates FtsH1, a  
893 component of the chloroplast FtsH protease, and affects protein degradation in chloroplasts.  
894 *Plant J.* 52, 309–321.
- 895 Shen, G., Yan, J., Pasapula, V., Luo, J., He, C., Clarke, A.K., and Zhang, H. (2007b). The  
896 chloroplast protease subunit ClpP4 is a substrate of the E3 ligase AtCHIP and plays an  
897 important role in chloroplast function. *Plant J.* 49, 228–237.
- 898 Smalle, J., and Vierstra, R.D. (2004). The ubiquitin 26S proteasome proteolytic pathway.  
899 *Annu Rev Plant Biol* 55, 555–590.
- 900 Tadini, L., Pesaresi, P., Kleine, T., Rossi, F., Guljamow, A., Sommer, F., Mühlhaus, T.,  
901 Schroda, M., Masiero, S., Pribil, M., et al. (2016). GUN1 Controls Accumulation of the  
902 Plastid Ribosomal Protein S1 at the Protein Level and Interacts with Proteins Involved in  
903 Plastid Protein Homeostasis. *Plant Physiology* 170, 1817–1830.
- 904 Taggart, J.C., Zauber, H., Selbach, M., Li, G.-W., and McShane, E. (2020). Keeping the  
905 Proportions of Protein Complex Components in Check. *Cell Syst* 10, 125–132.
- 906 Thimm, O., Bläsing, O., Gibon, Y., Nagel, A., Meyer, S., Krüger, P., Selbig, J., Müller, L.A.,  
907 Rhee, S.Y., and Stitt, M. (2004). MAPMAN: a user-driven tool to display genomics data sets  
908 onto diagrams of metabolic pathways and other biological processes. *The Plant Journal* 37,  
909 914–939.
- 910 Tian, T., Liu, Y., Yan, H., You, Q., Yi, X., Du, Z., Xu, W., and Su, Z. (2017). agriGO v2.0: a  
911 GO analysis toolkit for the agricultural community, 2017 update. *Nucleic Acids Res.* 45,  
912 W122–W129.
- 913 Tikhonov, A.N. (2014). The cytochrome b6f complex at the crossroad of photosynthetic  
914 electron transport pathways. *Plant Physiol. Biochem.* 81, 163–183.
- 915 Trapnell, C., Williams, B.A., Pertea, G., Mortazavi, A., Kwan, G., van Baren, M.J., Salzberg,

- 916 S.L., Wold, B.J., and Pachter, L. (2010). Transcript assembly and quantification by RNA-Seq  
917 reveals unannotated transcripts and isoform switching during cell differentiation. *Nat.*  
918 *Biotechnol.* 28, 511–515.
- 919 Tsai, H.-L., Lue, W.-L., Lu, K.-J., Hsieh, M.-H., Wang, S.-M., and Chen, J. (2009). Starch  
920 synthesis in *Arabidopsis* is achieved by spatial cotranscription of core starch metabolism  
921 genes. *Plant Physiology* 151, 1582–1595.
- 922 Van Hoewyk, D. (2016). Use of the non-radioactive SUnSET method to detect decreased  
923 protein synthesis in proteasome inhibited *Arabidopsis* roots. *Plant Methods* 12, 20.
- 924 Van Leene, J., Han, C., Gadeyne, A., Eeckhout, D., Matthijs, C., Cannoot, B., De Winne, N.,  
925 Persiau, G., Van De Slijke, E., Van de Cotte, B., et al. (2019). Capturing the phosphorylation  
926 and protein interaction landscape of the plant TOR kinase. *Nat Plants* 5, 316–327.
- 927 Wellburn, A.R. (1994). The Spectral Determination of Chlorophylls a and b, as well as Total  
928 Carotenoids, Using Various Solvents with Spectrophotometers of Different Resolution.  
929 *Journal of Plant Physiology* 144, 307–313.
- 930 Woodson, J.D., Joens, M.S., Sinson, A.B., Gilkerson, J., Salomé, P.A., Weigel, D.,  
931 Fitzpatrick, J.A., and Chory, J. (2015). Ubiquitin facilitates a quality-control pathway that  
932 removes damaged chloroplasts. *Science* 350, 450–454.
- 933 Wu, W., Liu, S., Ruwe, H., Zhang, D., Melonek, J., Zhu, Y., Hu, X., Gusewski, S., Yin, P.,  
934 Small, I.D., et al. (2016). SOT1, a pentatricopeptide repeat protein with a small MutS-related  
935 domain, is required for correct processing of plastid 23S-4.5S rRNA precursors in  
936 *Arabidopsis thaliana*. *Plant J.* 85, 607–621.
- 937 Wu, Z., Wang, Y., Lim, J., Liu, B., Li, Y., Vartak, R., Stankiewicz, T., Montgomery, S., and  
938 Lu, B. (2018). Ubiquitination of ABCE1 by NOT4 in Response to Mitochondrial Damage  
939 Links Co-translational Quality Control to PINK1-Directed Mitophagy. *Cell Metabolism* 28,  
940 130–144.e137.
- 941 Yamazaki, H., Tasaka, M., and Shikanai, T. (2004). PPR motifs of the nucleus-encoded  
942 factor, PGR3, function in the selective and distinct steps of chloroplast gene expression in  
943 *Arabidopsis*. *Plant J.* 38, 152–163.
- 944 Yu, X., Willmann, M.R., Anderson, S.J., and Gregory, B.D. (2016). Genome-Wide Mapping  
945 of Uncapped and Cleaved Transcripts Reveals a Role for the Nuclear mRNA Cap-Binding  
946 Complex in Cotranslational RNA Decay in *Arabidopsis*. *Plant Cell* 28, 2385–2397.

947 Zhang, X., Henriques, R., Lin, S.-S., Niu, Q.-W., and Chua, N.-H. (2006). Agrobacterium-  
948 mediated transformation of *Arabidopsis thaliana* using the floral dip method. *Nat Protoc* 1,  
949 641–646.

950 Zoschke, R., and Bock, R. (2018). Chloroplast Translation: Structural and Functional  
951 Organization, Operational Control, and Regulation. *Plant Cell* 30, 745–770.

952 Zoschke, R., Qu, Y., Zubo, Y.O., Börner, T., and Schmitz-Linneweber, C. (2013). Mutation of  
953 the pentatricopeptide repeat-SMR protein SVR7 impairs accumulation and translation of  
954 chloroplast ATP synthase subunits in *Arabidopsis thaliana*. *J. Plant Res.* 126, 403–414.

## 955 **Figure legends**

956 **Figure 1. Identification of NOT4-like genes in plants. (a)** Schematic diagram of protein  
957 domain structure and % amino acid identity for *Sachharomyces cerevisiae* (*Sc*) and  
958 *Arabidopsis thaliana* (*At*) NOT4 proteins. For full sequence alignments see Supplementary  
959 Figure 1. **(b)** and **(c)** Representative rosette images of 4-week old *col-0*, *not4a-c* mutants,  
960 and two independent *not4a* complementation (*N4A-G1* and *G3*) lines grown under long day  
961 (LD) conditions. Bar = 1cm. **(d)** Days to flowering and rosette leaf number at flowering for  
962 genotypes shown under short day (SD) conditions (n=10-12 per genotype). Box and  
963 whiskers plots show max and min, 25<sup>th</sup> to 75<sup>th</sup> percentiles, median and mean (+). Letters  
964 indicate one way ANOVA; Tukey's test (p<0.01). **(e)** Chlorophyll content (A, B and total) of  
965 SD grown rosette leaves from *Col-0*, *not4a* and two independent complementation lines  
966 (*N4A-G1* and *G3*). Error bars = SEM. **(f)** Lugol's iodine staining of *Col-0* and *not4a* rosette  
967 leaves. Bar = 1cm. **(g)** Histochemical staining of 7-day-old seedling of the *N4A-G3*  
968 complementation line showing localisation of *pNOT4::NOT4-GUS* to the first true leaves.  
969 This correlates with where the pale-yellow phenotype first presents in *not4a* (arrowhead)  
970 relative to *Col-0*. Bar = 200µm. **(h)** Detection of *pNOT4::NOT4A-GUS* by anti-GUS western  
971 blot in total vs chloroplast-specific protein extracts. LHCA4 is a chloroplast enriched protein  
972 control. UGPase is a cytosol control showing efficacy of chloroplast enrichment. RuBL was  
973 used as a loading control.

974

975 **Figure 2. NOT4A is required for chloroplast and photosynthetic function. (a)** Volcano  
976 plot of up and down DEGs in *not4a* vs WT. **(b)** Graphical representation of 'cell part' and  
977 'chloroplast' Gene Ontology (GO) enrichment of DEGs in *not4a* vs WT. Asterisk refers to  
978 significant enrichment. **(c)** Blue native (BN) gel of thylakoid protein complexes from *Col-0*,  
979 *not4a* and *N4A-G3*. Plants were grown under standard conditions (100 µmol photons  
980 m<sup>-2</sup> s<sup>-1</sup>, 8 h/16 h light/dark), and the entire thylakoid network was solubilized with 1% (w/v)

981 dodecyl maltoside (DM) and separated using BN gel electrophoresis. 50  $\mu\text{g}$  of total protein  
982 was loaded. Red and blue arrows refer to PSII m/Cyt  $b_6/f$  and PSI-NDH  $mc$  bands,  
983 respectively, which are significantly depleted in *not4a*. See also Supplemental Figure 4a.  
984 **(d)** Second dimension separation of DM-solubilised thylakoid proteins from Col-0 and *not4a*  
985 showing depletion of Cyt  $b_6/f$  components PetA, PetB, PetC and PetD in *not4a*. The protein  
986 bands were identified based on Aro et al. 2005. **(e)** Light-intensity dependence of ETR(I) and  
987 ETR(II). Dark adapted Col-0 and *not4a* plants were subjected to illumination steps of 3 min  
988 at light intensities of 25-1000  $\mu\text{mol photons m}^{-2} \text{s}^{-1}$  followed by a saturating flash (700 ms) to  
989 determine  $F_M$  and  $P_M$ . The relative rates of electron transfer through PSI and PSII, ETR(I)  
990 and ETR (II), respectively, were calculated as  $Y(I) \times \text{PPFD} \times 0.84 \times 0.5$  and  $Y(II) \times \text{PPFD} \times$   
991  $0.84 \times 0.5$ . Each point represents the average  $\pm$  SD ( $n = 5$ ).

992 **Figure 3. NOT4A is required for plastid ribosome biogenesis. (a) and (b)** Volcano plots  
993 showing differential abundance of total and plastid-localised proteins in *not4a* vs wild type  
994 (Col-0): x-axis, log<sub>2</sub>-Fold Change values of protein abundances in *not4a* versus wildtype; y-  
995 axis, log<sub>10</sub>-p values from a two-sided t-test. For the plastid-specific graph, photosynthetic  
996 and plastid ribosome proteins are highlighted in green and blue, respectively. The number of  
997 quantified proteins and their overlap are shown in Venn diagrams above each plot. **(c)** and  
998 **(d)** Histograms of summed protein amounts (ppm) of MapMan (Thimm et al., 2004)  
999 annotated functional groups. Asterisks highlight functional groups that are significantly  
1000 depleted in *not4a* vs Col-0. Error bars= SEM. **(e)** Relative amounts (ng/ $\mu\text{l}$ ) of 50S (23s and  
1001 23sb) and 30S (16s) plastid rRNAs in *not4a* vs Col-0. Values are quantified from  
1002 TapeStation data shown in Supplemental Figure 4 following normalisation to cytosolic 18s  
1003 rRNA. **(f)** Heatmap showing relative transcript and protein fold-changes for 50S and 30S  
1004 plastid ribosome subunits in *not4a* vs Col-0.

1005

1006 **Figure 4. Plastid mRNA translation is compromised in the *not4a* mutant. (a)** 10-day old  
1007 WT, *not4a* and N4A-G3 complementation line seedlings grown on vertical plates +/- 10 $\mu\text{M}$   
1008 lincomycin. Bar = 1 cm. **(b)** same as in **(a)** but on horizontal plates. Bar = 1cm. **(c)** Protein  
1009 synthesis rates in Col-0 and *not4a* chloroplasts, determined by anti-puromycin ( $\alpha$ -Pur)  
1010 western blot following a 2-hour (h) puromycin treatment time course. LHCA4 and CBB  
1011 (Coomassie Brilliant blue) are shown as loading controls. **(d)** The amount of D1 protein (% of  
1012 0 hr) and PSII efficiency ( $F_V/F_M$ ) during a photoinhibitory treatment at 1000  $\mu\text{mol photons m}^{-2}$   
1013  $\text{s}^{-1}$  with and without lincomycin (linc) and during recovery without linc at 100  $\mu\text{mol photons m}^{-2}$   
1014  $\text{s}^{-1}$ . Total leaf protein extracts were separated on an SDS-PAGE and immunoblotted with a  
1015 D1-specific antibody. Representative results of three biological replicates are presented in  
1016 the figure. For PSII efficiency the average  $\pm$  SD ( $n = 5$ ) is presented.

1017

1018 **Figure 5. Functional domain analysis of NOT4A.** (a) Schematic diagram showing position  
1019 of point mutations in RING and RRM domain. Mutations in black are those introduced to the  
1020 NOT4A, which correspond to equivalent conserved residues in ScNOT4 (shown in grey),  
1021 additionally highlighted in yellow in Supplementary Figure 1 sequence alignments. (b) anti-  
1022 GUS western blot of steady state levels of *pNOT4A::NOT4A-GUS* variants expressed in  
1023 *not4a*. (c) 10-day old *not4a* and *pNOT4A::NOT4A-GUS* complementation lines grown on  
1024 vertical plates +/- 10µM lincomycin. Bar = 1 cm. (d) Representative rosette images of 3-  
1025 week old *not4a* and *pNOT4A::NOT4A-GUS* complementation lines under long day (LD)  
1026 conditions. Bar = 1cm. (e) Quantitative RT-PCR (qPCR) of *NOT4A* in 14-day-old Col-0 lines  
1027 grown on media +/- 10µM Lincomycin. Expression levels normalised to *ACTIN7* and shown  
1028 relative to untreated Col-0. Data are average of three biological replicates. Error bars =  
1029 SEM.

1030

1031 **Fig 6. The *not4a* mutant mimics the *pgr3* pentatricopeptide mutant.** (a) Volcano plot of  
1032 GO chloroplast-associated (GO:0009507) DEGs in *not4a* vs WT. (b) Quantitative PCR  
1033 (qPCR) of *PGR3* in Col-0, *not4a* and N4A-G3 complementation line. Expression levels  
1034 normalised to *ACTIN7* and shown relative to Col-0 WT. Data are average of three biological  
1035 replicates. Letters indicate one way ANOVA; Tukey's test ( $p < 0.01$ ). (c) Representative  
1036 rosette images of 4-week old Col-0, *not4a*, *Ws-4* and *pgr3-4* lines grown under long day (LD)  
1037 conditions. Bar = 1cm. (d) 10-day old Col-0, *not4a*, *Ws-4* and *pgr3-4* seedlings grown on  
1038 vertical and horizontal plates +/- 10µM lincomycin. Bar = 1 cm. (e) qPCR of *PetL* and *PetG*  
1039 in 10-day old Col-0, *not4a*, *Ws-4* and *pgr3-4* seedlings. Expression levels normalised to  
1040 *ACTIN7* and shown relative to Col-0 WT. Data are average of three biological replicates.  
1041 Letters indicate one way ANOVA; Tukey's test ( $p < 0.01$ ). Error bars = SEM. (f) Relative  
1042 amounts (ng/µl) of 50S (23s and 23sb) and 30S (16s) plastid rRNAs in Col-0, *not4a*, *Ws-4*  
1043 and *pgr3-4* seedlings. Values are quantified from TapeStation data shown in Supplemental  
1044 Figure 4, following normalisation to cytosolic 18S rRNA. Col-0 and *not4a* data are same as in  
1045 figure 3e. Error bars = SEM. (g) ETR(I) and ETR(II) during an induction curve measurement.  
1046 Dark adapted Col-0, *not4a*, *Ws-4* and *pgr3* plants were illuminated with 1000 µmol photons  
1047  $m^{-2} s^{-1}$  actinic light and a saturating flash was applied every 2 min to determine  $F_{M'}$  and  $P_{M'}$ .  
1048 The relative rates of electron transfer through PSI and PSII, ETR(I) and ETR (II),  
1049 respectively, were calculated as in Figure 2. Each point represents the average  $\pm$  SD ( $n = 3$ -  
1050 4).

1051

1052 **Fig 7. PGR3 can rescue the chloroplast associated defects in *not4a*.** (a) Anti-YFP  
1053 western blot of steady state PGR3-YFP protein levels in three independent Col-0 and *not4a*  
1054 lines expressing *pPGR3::PGR3-YFP*. (b) Quantitative PCR (qPCR) of *PGR3* in Col-0, *not4a*  
1055 and the *PGR3-YFP* lines from (a). Expression levels normalised to *ACTIN7* and shown  
1056 relative to Col-0 WT. Data are average of three biological replicates. Error bars = SEM. (c)  
1057 Confocal images of hypocotyl cells in Col-0 and *not4a* lines expressing *pPGR3::PGR3-YFP*.  
1058 Panels show PGR3-YFP in green (left), chloroplasts in red (middle) and bright field view  
1059 (right). (d) 10-day old Col-0, *not4a* and PGR3-YFP transgenic seedlings grown on vertical  
1060 plates +/- 10µM lincomycin. Bar = 1 cm. (e) Representative rosette images of 4-week old  
1061 Col-0, *not4a* and *not4a PGR3-YFP* lines grown under long day (LD) conditions. Bar = 1cm.  
1062 (f) Cycloheximide (CHX) chase of PGR3-YFP and ACTIN in Col-0 and *not4a* +/- bortezomib  
1063 (BZ). (g) Yeast two hybrid assay between NOT4A and PGR3. EV = empty vector.  
1064 P53/SV40 = positive control. Growth on -LW confirms successful transformation; growth on -  
1065 AHLW denotes interaction.

1066

#### 1067 **Supplemental information**

1068 Supplemental figures 1-7

1069 Supplemental data file 1- Transcriptome profiling

1070 Supplemental data file 2- Proteome profiling

1071 Supplemental data file 3- Primer list

1072

1073



**Figure 1**

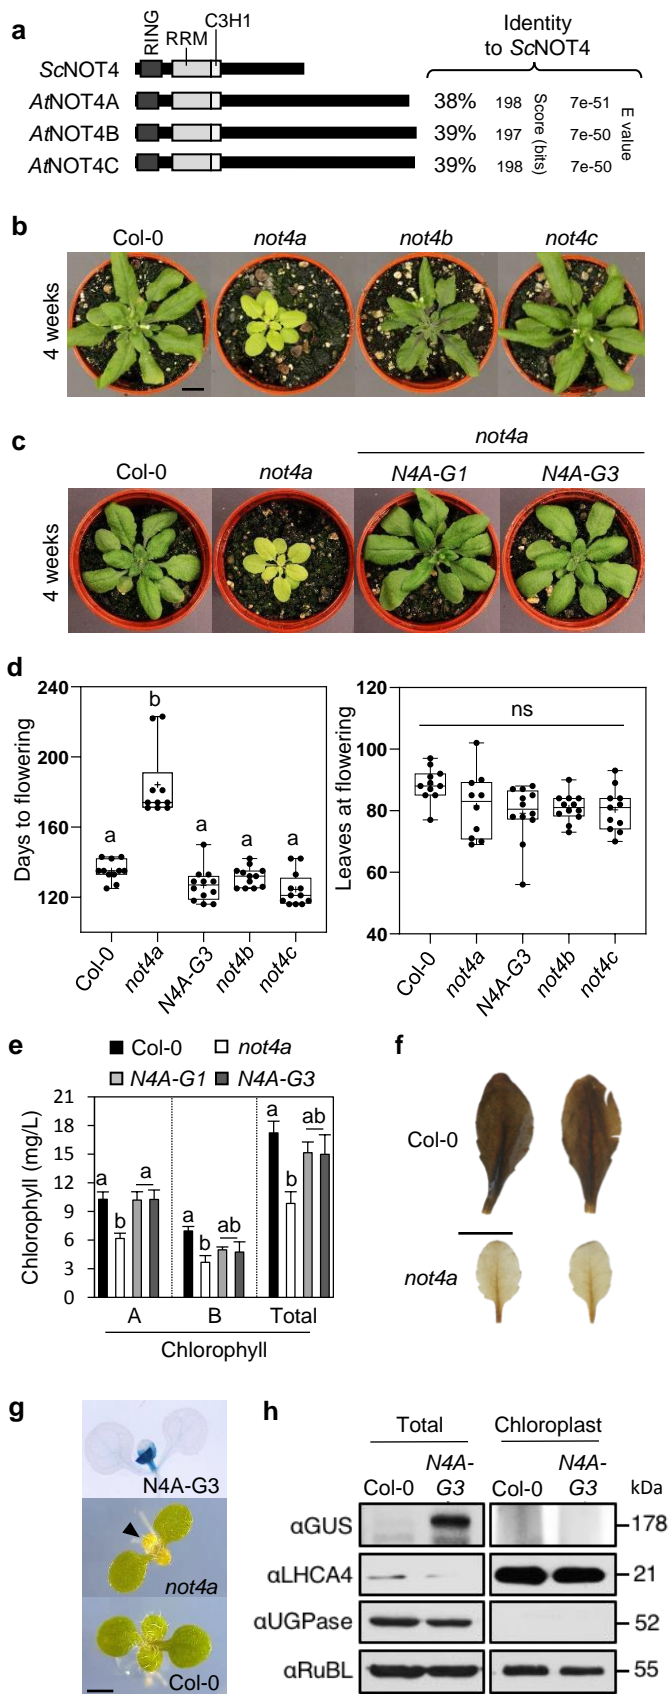

**Figure 2**

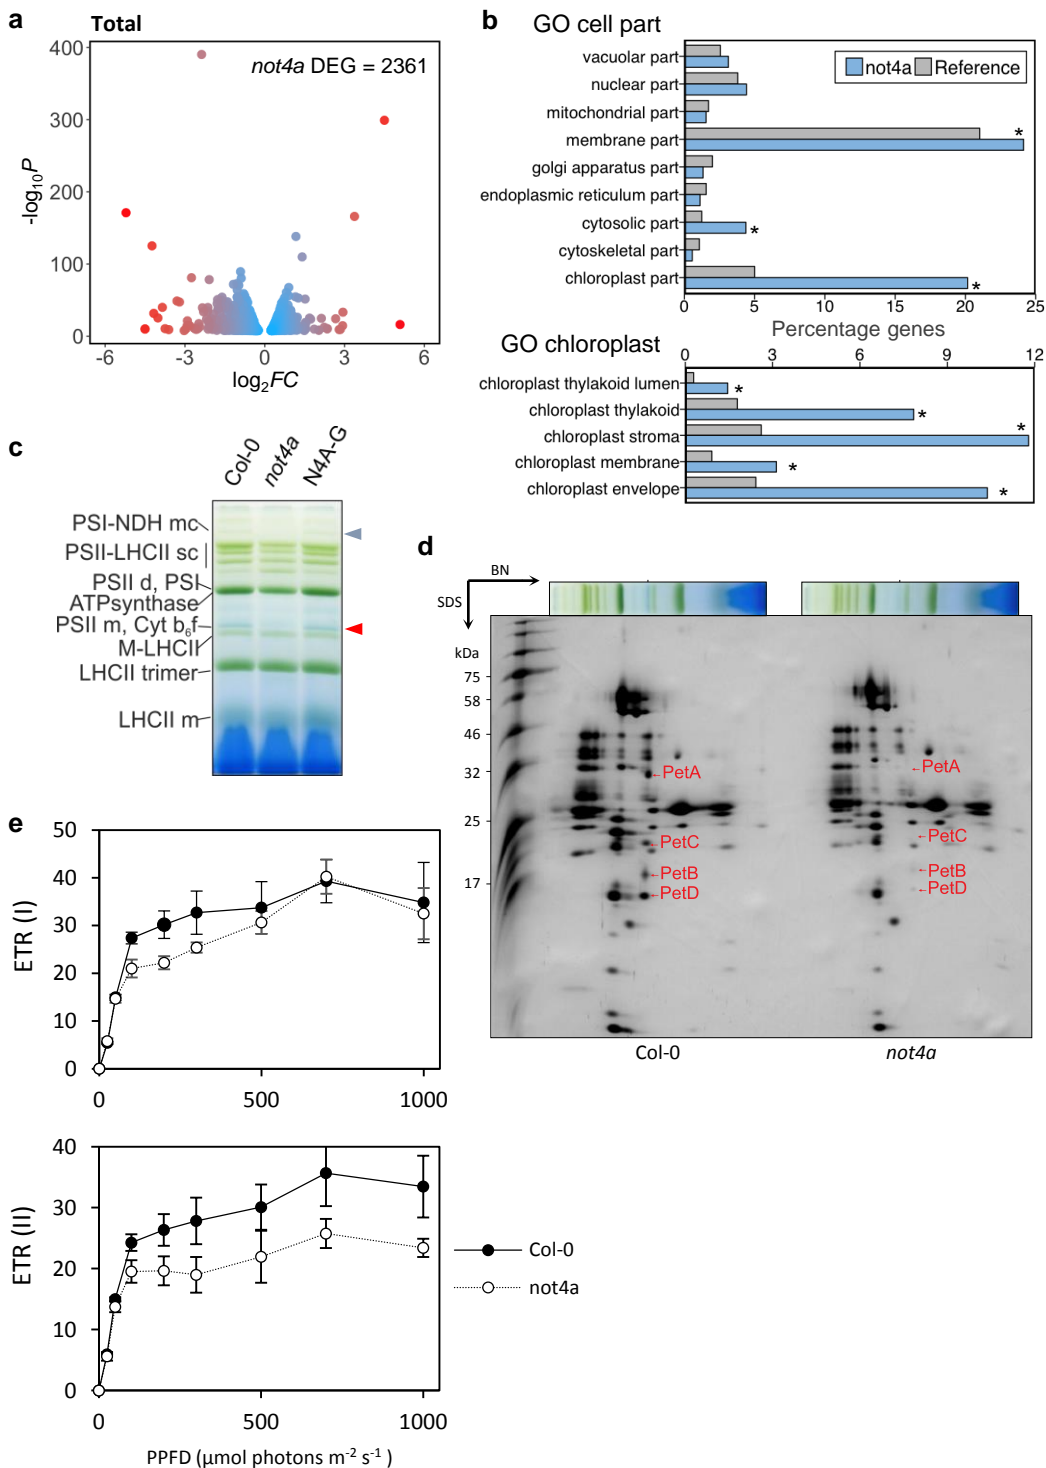

**Figure 3**

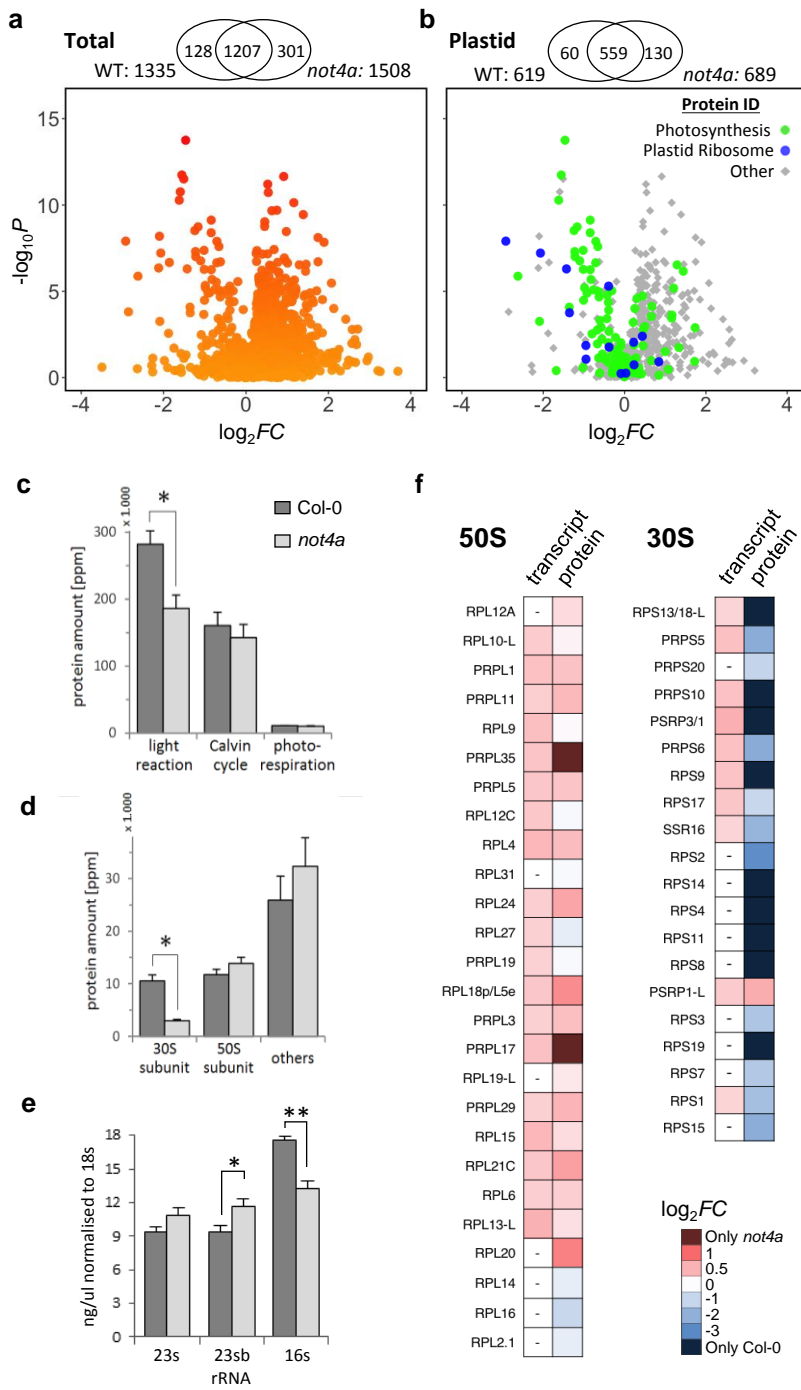

**Figure 4**

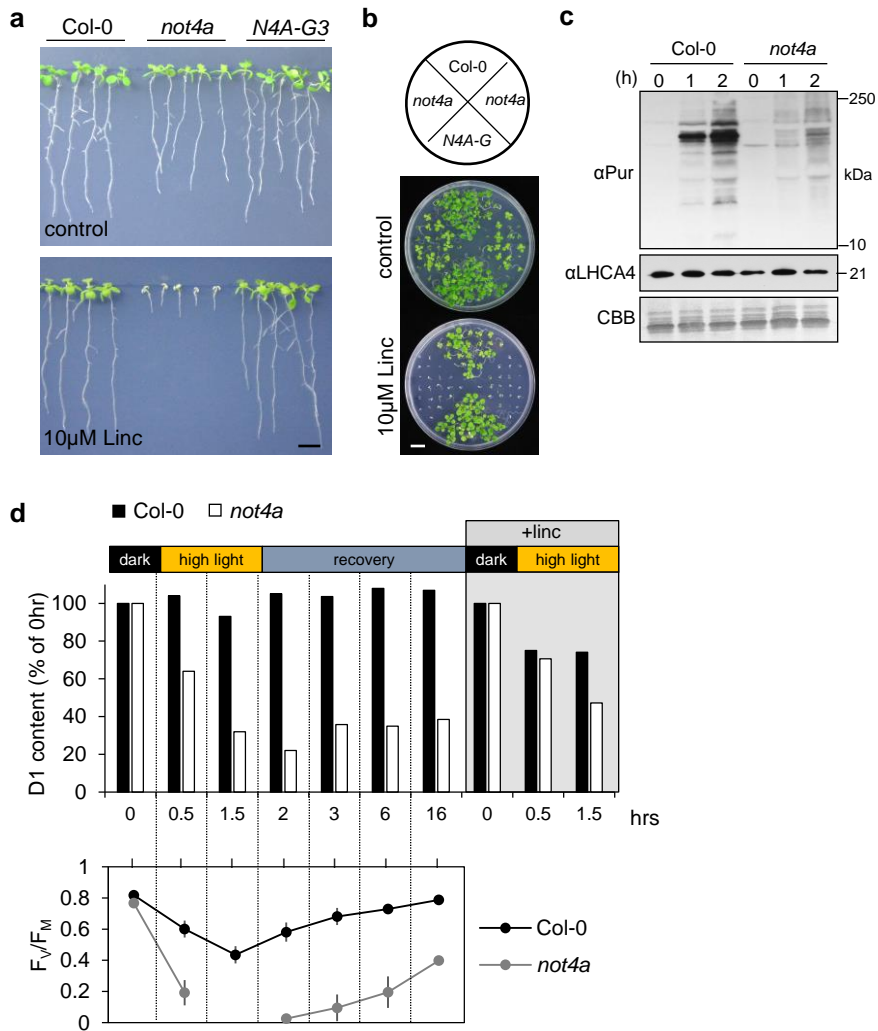

**Figure 5**

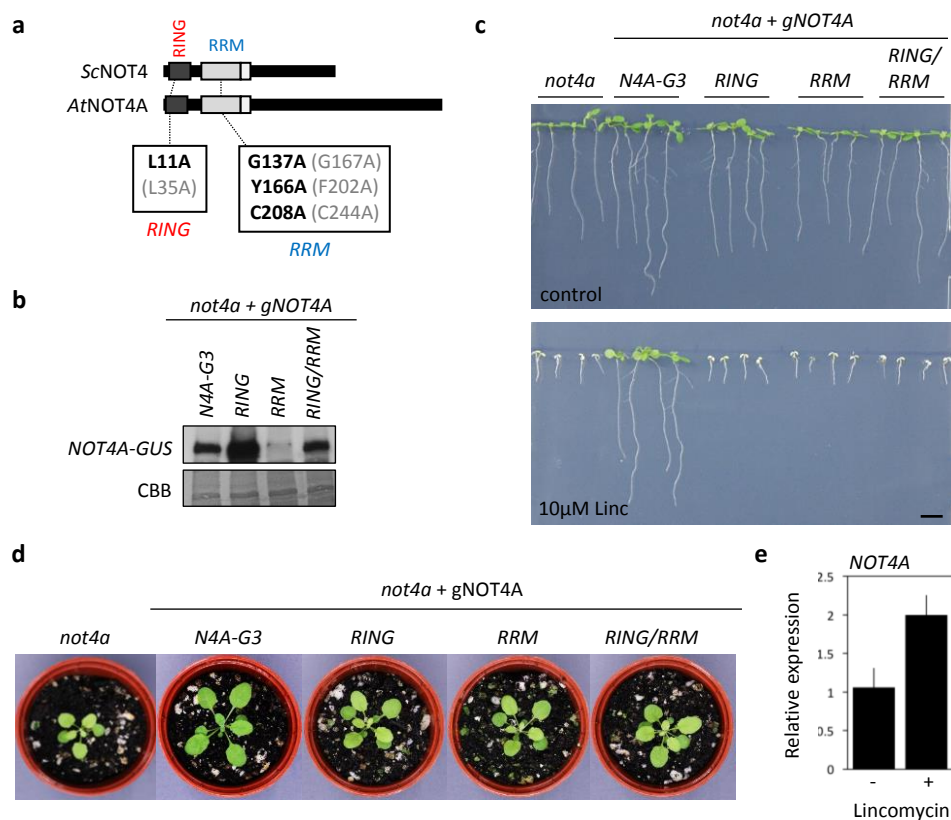

Figure 6

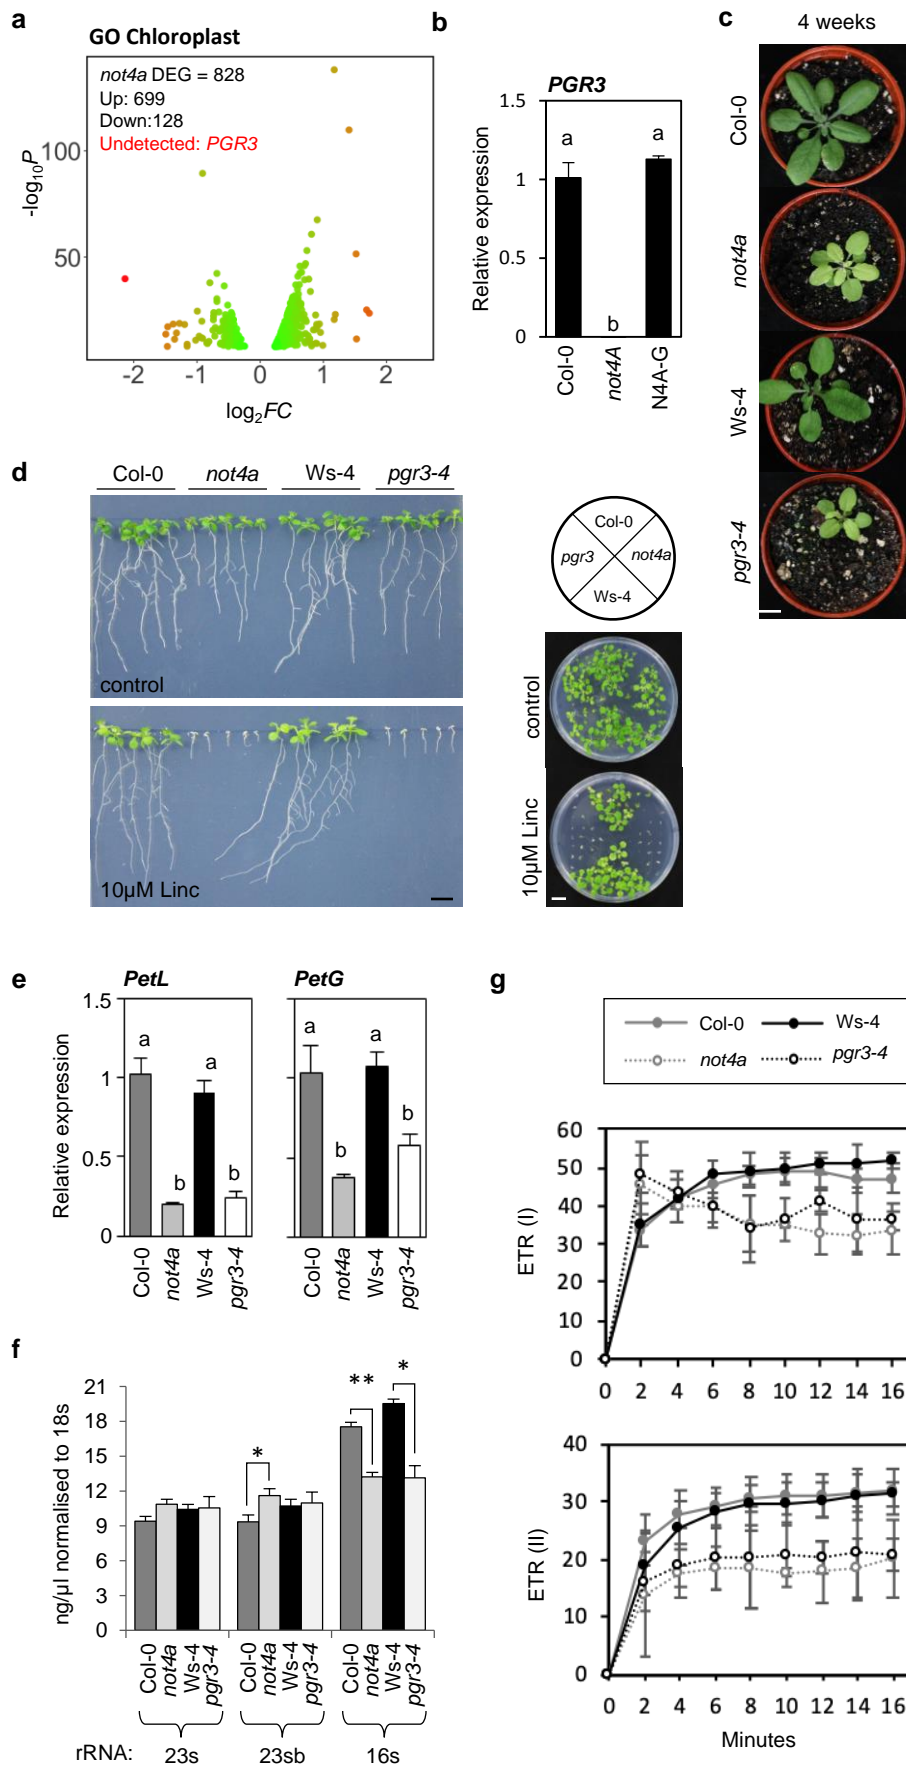

**Figure 7.**

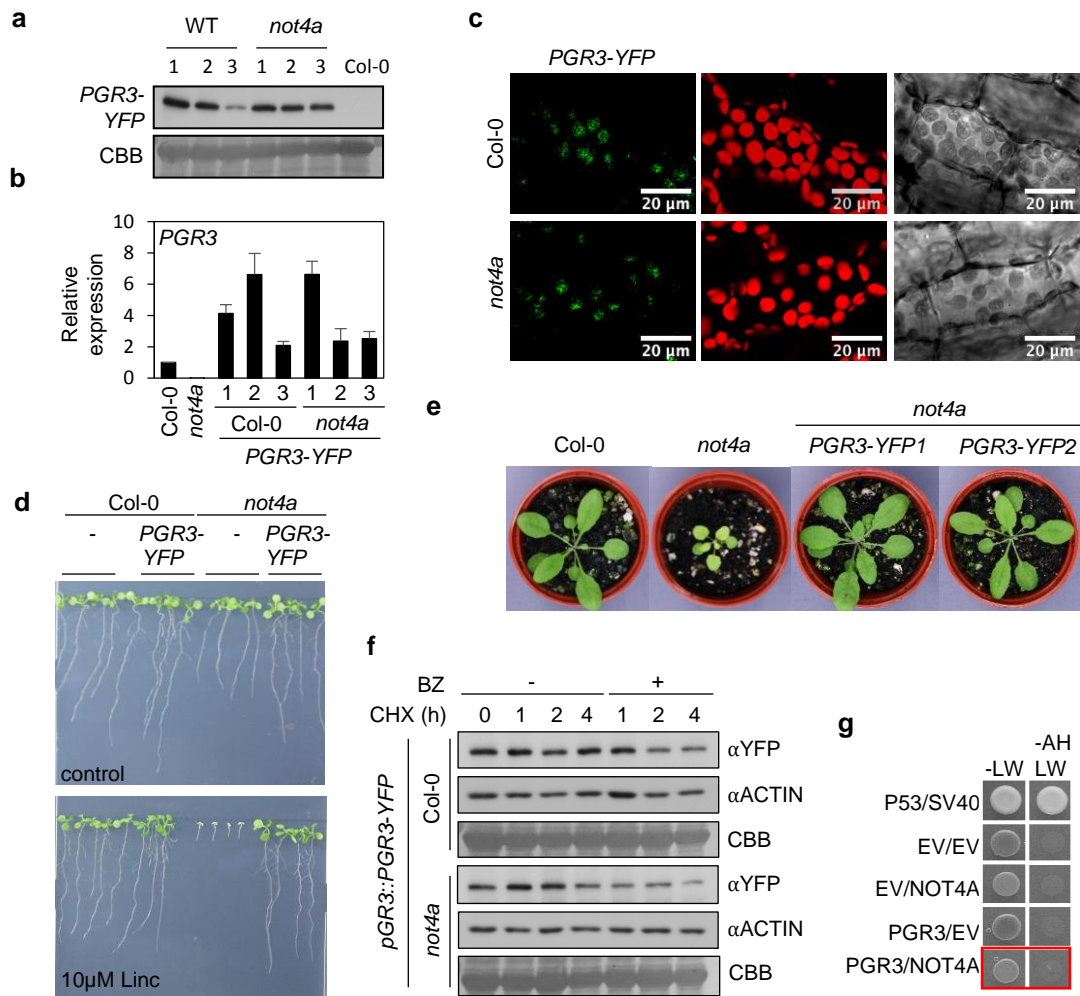

Source: https://www.biorxiv.org/content/10.1101/2020.04.02.021998v1.full.pdf
